# Supplementary material
Source: PubMed Central journal article supplement (PMC7028505)
Supplement: NIHMS1046688-supplement-Supp_info.pdf [file NIHMS1046688-supplement-Supp_info.pdf]

# Supporting Information for (Structured gene-environment interaction analysis) by (Mengyun Wu, Qingzhao Zhang and Shuangge Ma)

## 1 Web Appendix A

### 1.1 Estimation under the AFT model

For subject  $i$ , denote  $T_i$  as the survival time of interest. Use notations similar to those in the main text. For  $T_i$ , consider the accelerated failure time (AFT) model

$$\log(T_i) = \alpha_0 + \sum_{k=1}^q Z_{ik}\alpha_k + \sum_{j=1}^p X_{ij}\beta_j + \sum_{k=1}^q \sum_{j=1}^p Z_{ik}X_{ij}\eta_{kj} + \varepsilon_i,$$

where  $\alpha_0$  is the intercept. In practice, right censoring is usually present. Denote  $C_i$  as the censoring time for subject  $i$ , then we observe  $Y_i = \log(\min(T_i, C_i))$  and  $\tilde{\delta}_i = I(T_i \leq C_i)$ . Assume that data  $\{(\mathbf{Z}_i, \mathbf{X}_i, Y_i, \tilde{\delta}_i), i = 1, \dots, n\}$  have been sorted according to  $Y_i$ 's from the smallest to the largest.

For estimation, the following weighted least squared loss function is adopted,

$$\frac{1}{2n} \sum_{i=1}^n w_i \left[ Y_i - \left( \alpha_0 + \sum_{k=1}^q Z_{ik}\alpha_k + \sum_{j=1}^p X_{ij}\beta_j + \sum_{k=1}^q \sum_{j=1}^p Z_{ik}X_{ij}\eta_{kj} \right) \right]^2, \quad (1)$$

where  $w_i$ 's are the Kaplan-Meier weights defined as

$$w_1 = \frac{\tilde{\delta}_1}{n}, \quad w_i = \frac{\tilde{\delta}_i}{n-i+1} \prod_{l=1}^{i-1} \left( \frac{n-l}{n-l+1} \right)^{\tilde{\delta}_l}, \quad i = 2, \dots, n.$$

We center  $Y_i$ ,  $\mathbf{Z}_i$ ,  $\mathbf{X}_i$ , and  $\mathbf{W}_i^{(k)} = (Z_{ik}X_{i1}, \dots, Z_{ik}X_{ip})$  using their weighted means. Specifically,

$$Y_i = \sqrt{w_i}(Y_i - \bar{Y}), \quad \mathbf{Z}_i = \sqrt{w_i}(\mathbf{Z}_i - \bar{\mathbf{Z}}), \quad \mathbf{X}_i = \sqrt{w_i}(\mathbf{X}_i - \bar{\mathbf{X}}), \quad \mathbf{W}_i^{(k)} = \sqrt{w_i}(\mathbf{W}_i^{(k)} - \bar{\mathbf{W}}^{(k)}),$$

where  $\bar{Y} = \sum_{i=1}^n w_i Y_i / \sum_{i=1}^n w_i$ ,  $\bar{\mathbf{Z}} = \sum_{i=1}^n w_i \mathbf{Z}_i / \sum_{i=1}^n w_i$ ,  $\bar{\mathbf{X}} = \sum_{i=1}^n w_i \mathbf{X}_i / \sum_{i=1}^n w_i$ , and  $\bar{\mathbf{W}}^{(k)} = \sum_{i=1}^n w_i \mathbf{W}_i^{(k)} / \sum_{i=1}^n w_i$ . Then, loss function (1) can be rewritten as

$$\frac{1}{2n} \left\| \mathbf{Y} - \mathbf{Z}\boldsymbol{\alpha} - \mathbf{X}\boldsymbol{\beta} - \sum_{k=1}^q \mathbf{W}^{(k)}\boldsymbol{\eta}_k \right\|_2^2.$$

## 1.2 Computation

Consider the objective function

$$\begin{aligned}
Q_n(\boldsymbol{\theta}) &= \frac{1}{2n} \left\| \mathbf{Y} - \mathbf{Z}\boldsymbol{\alpha} - \mathbf{X}\boldsymbol{\beta} - \sum_{k=1}^q \mathbf{W}^{(k)}(\boldsymbol{\beta} \odot \boldsymbol{\gamma}_k) \right\|_2^2 + \sum_{j=1}^p \rho(|\beta_j|; \lambda_1, r) + \sum_{j=1}^p \sum_{k=1}^q \rho(|\gamma_{kj}|; \lambda_1, r) \\
&+ \frac{1}{2} \lambda_2 \boldsymbol{\beta}' \mathbf{J} \boldsymbol{\beta} + \frac{1}{2} \lambda_2 \sum_{k=1}^q \boldsymbol{\gamma}_k' \mathbf{J} \boldsymbol{\gamma}_k.
\end{aligned} \tag{2}$$

With fixed tuning parameters, optimization of (2) can be conducted using an iterative coordinate descent (CD) algorithm, which optimizes the objective function with respect to one of the three vectors,  $\boldsymbol{\alpha}$ ,  $\boldsymbol{\beta}$ , and  $\boldsymbol{\gamma}$ , at a time and iteratively cycles through all parameters until convergence.

The proposed algorithm proceeds as follows:

**Step 1** Initialize  $t = 0$ ,  $\boldsymbol{\beta}^{(t)} = \mathbf{0}$ ,  $\boldsymbol{\gamma}^{(t)} = \mathbf{0}$ ,  $\boldsymbol{\alpha}^{(t)} = (\mathbf{Z}'\mathbf{Z})^{-1}\mathbf{Z}'\mathbf{Y}$ , and  $\mathbf{res}^{(t)} = \mathbf{Y} - \mathbf{Z}\boldsymbol{\alpha}^{(t)} - \mathbf{X}\boldsymbol{\beta}^{(t)} - \sum_{k=1}^q \mathbf{W}^{(k)}(\boldsymbol{\beta}^{(t)} \odot \boldsymbol{\gamma}_k^{(t)})$ , where  $\boldsymbol{\alpha}^{(t)}$ ,  $\boldsymbol{\beta}^{(t)}$ ,  $\boldsymbol{\gamma}^{(t)}$  and  $\mathbf{res}^{(t)}$  denote the estimates of  $\boldsymbol{\alpha}$ ,  $\boldsymbol{\beta}$ ,  $\boldsymbol{\gamma}$  and residual vector at iteration  $t$ , respectively.

**Step 2** Update  $t = t + 1$ . With  $\boldsymbol{\gamma}$  and  $\boldsymbol{\alpha}$  fixed at  $\boldsymbol{\gamma}^{(t-1)}$  and  $\boldsymbol{\alpha}^{(t-1)}$ , optimize (2) with respect to  $\boldsymbol{\beta}$ . Let  $\tilde{\mathbf{Y}}^{(t)} = \mathbf{Y} - \mathbf{Z}\boldsymbol{\alpha}^{(t-1)}$  and  $\tilde{\mathbf{X}}^{(t)} = \mathbf{X} + \sum_{k=1}^q \mathbf{W}^{(k)} \odot \left( \mathbf{1}_{n \times 1} \left( \boldsymbol{\gamma}_k^{(t-1)} \right)' \right)$  with  $\mathbf{1}_{n \times 1} = (1, \dots, 1)_{n \times 1}$ . Then

$$\boldsymbol{\beta}^{(t)} = \operatorname{argmin} \frac{1}{2n} \left\| \tilde{\mathbf{Y}}^{(t)} - \tilde{\mathbf{X}}^{(t)} \boldsymbol{\beta} \right\|_2^2 + \sum_{j=1}^p \rho(|\beta_j|; \lambda_1, r) + \frac{1}{2} \lambda_2 \boldsymbol{\beta}' \mathbf{J} \boldsymbol{\beta}. \tag{3}$$

For  $j = 1, \dots, p$ , carry out the following steps sequentially.

**Step 2.1** Compute

$$\begin{aligned}
\mathbf{res}_{-j}^{(t)} &= \mathbf{res}^{(t-1)} + \tilde{\mathbf{X}}_j^{(t)} \beta_j^{(t-1)}, \quad \chi_j^{(t)} = \frac{1}{n} \left( \tilde{\mathbf{X}}_j^{(t)} \right)' \tilde{\mathbf{X}}_j^{(t)}, \\
\varphi_j^{(t)} &= \frac{1}{n} \left( \tilde{\mathbf{X}}_j^{(t)} \right)' \mathbf{res}_{-j}^{(t)}, \quad \Delta_j^{(t)} = \sum_{l=1}^{j-1} \beta_l^{(t)} J_{jl} + \sum_{l=j+1}^p \beta_l^{(t-1)} J_{jl}.
\end{aligned}$$

**Step 2.2** Update the estimate of  $\beta_j$  as

$$\beta_j^{(t)} = \begin{cases} \frac{\text{ST}(\varphi_j^{(t)} - \lambda_2 \Delta_j^{(t)}, \lambda_1)}{\chi_j^{(t)} + \lambda_2 J_{jj} - \frac{1}{r}}, & |\varphi_j^{(t)} - \lambda_2 \Delta_j^{(t)}| \leq \lambda_1 r \left( \chi_j^{(t)} + \lambda_2 J_{jj} \right) \\ \frac{\varphi_j^{(t)} - \lambda_2 \Delta_j^{(t)}}{\chi_j^{(t)} + \lambda_2 J_{jj}}, & |\varphi_j^{(t)} - \lambda_2 \Delta_j^{(t)}| > \lambda_1 r \left( \chi_j^{(t)} + \lambda_2 J_{jj} \right) \end{cases}, \quad (4)$$

where  $\text{ST}(\nu, \lambda_1) = \text{sgn}(\nu)(|\nu| - \lambda_1)_+$  is the soft-thresholding operator.

**Step 2.3** Update  $\mathbf{res}^{(t-1)} = \mathbf{res}^{(t-1)} + \tilde{\mathbf{X}}_j^{(t)} \beta_j^{(t-1)} - \tilde{\mathbf{X}}_j^{(t)} \beta_j^{(t)}$ .

**Step 3** With  $\beta$  and  $\alpha$  fixed at  $\beta^{(t)}$  and  $\alpha^{(t-1)}$ , optimize (2) with respect to  $\gamma$ . Let  $\check{\mathbf{Y}}^{(t)} = \mathbf{Y} - \mathbf{Z}\alpha^{(t-1)} - \mathbf{X}\beta^{(t)}$  and  $(\tilde{\mathbf{W}}^{(k)})^{(t)} = \mathbf{W}^{(k)} \odot (\mathbf{1}_{n \times 1} (\beta^{(t)})')$ . Then

$$(\gamma_1^{(t)}, \dots, \gamma_q^{(t)}) = \underset{\gamma}{\text{argmin}} \frac{1}{2n} \left\| \check{\mathbf{Y}}^{(t)} - \sum_{k=1}^q (\tilde{\mathbf{W}}^{(k)})^{(t)} \gamma_k \right\|_2^2 + \sum_{k=1}^q \sum_{j=1}^p \rho(|\gamma_{kj}|; \lambda_1, r) + \frac{1}{2} \lambda_2 \sum_{k=1}^q \gamma_k' \mathbf{J} \gamma_k.$$

For  $k = 1, \dots, q$  and  $j \in \{j : \beta_j^{(t)} \neq 0, j = 1, \dots, p\}$ , conduct estimation similar to Steps 2.1, 2.2 and 2.3.

**Step 4** Compute  $\alpha^{(t)} = (\mathbf{Z}'\mathbf{Z})^{-1} \mathbf{Z}'(\mathbf{res}^{(t-1)} + \mathbf{Z}\alpha^{(t-1)})$  and  $\mathbf{res}^{(t)} = \mathbf{res}^{(t-1)} + \mathbf{Z}\alpha^{(t-1)} - \mathbf{Z}\alpha^{(t)}$ .

**Step 5** Repeat Steps 2-4 until convergence. In our numerical study, convergence is concluded if  $\frac{|Q_n(\theta^{(t)}) - Q_n(\theta^{(t-1)})|}{|Q_n(\theta^{(t-1)})|} < 10^{-4}$ .

### 1.2.1 Details for Steps 2.1 and 2.2 of the proposed algorithm

Consider objective function (3). For  $j = 1, \dots, p$ , the CD algorithm optimizes the objective function with respect to  $\beta_j$  while fixing the other parameters  $\beta_l (l \neq j)$  at their current estimates  $\beta_l^{(t)}$  for  $l < j$  or  $\beta_l^{(t-1)}$  for  $l > j$ . Specifically, consider the following simplified objective function

$$Q_s(\beta_j) = \frac{1}{2n} \left\| \mathbf{res}_{-j}^{(t)} - \tilde{\mathbf{X}}_j^{(t)} \beta_j \right\|_2^2 + \rho(|\beta_j|; \lambda_1, r) + \frac{1}{2} \lambda_2 \left( J_{jj} \beta_j^2 + 2 \sum_{l=1}^{j-1} \beta_l^{(t)} J_{jl} \beta_j + 2 \sum_{l=j+1}^p \beta_l^{(t-1)} J_{jl} \beta_j \right), \quad (5)$$

where  $\mathbf{res}_{-j}^{(t)} = \tilde{\mathbf{Y}}^{(t)} - \sum_{l=1}^{j-1} \tilde{\mathbf{X}}_l^{(t)} \beta_l^{(t)} - \sum_{l=j+1}^p \tilde{\mathbf{X}}_l^{(t)} \beta_l^{(t-1)} = \mathbf{res}^{(t-1)} + \tilde{\mathbf{X}}_j^{(t)} \beta_j^{(t-1)}$  with  $\mathbf{res}^{(t-1)} = \tilde{\mathbf{Y}}^{(t)} - \sum_{l=1}^{j-1} \tilde{\mathbf{X}}_l^{(t)} \beta_l^{(t)} - \sum_{l=j}^p \tilde{\mathbf{X}}_l^{(t)} \beta_l^{(t-1)}$ . The first order derivative of (5) is

$$\begin{aligned} \frac{\partial Q_s(\beta_j)}{\partial \beta_j} &= -\frac{1}{n} \left( \tilde{\mathbf{X}}_j^{(t)} \right)' \mathbf{res}_{-j}^{(t)} + \frac{1}{n} \left( \tilde{\mathbf{X}}_j^{(t)} \right)' \tilde{\mathbf{X}}_j^{(t)} \beta_j + \lambda_1 \text{sgn}(\beta_j) \begin{cases} 1 - \frac{|\beta_j|}{\lambda_1 r} & |\beta_j| \leq \lambda_1 r \\ 0 & |\beta_j| > \lambda_1 r, \end{cases} + \lambda_2 J_{jj} \beta_j + \lambda_2 \Delta_j^{(t)}, \\ &\triangleq -\varphi_j^{(t)} + \chi_j^{(t)} \beta_j + \lambda_1 \text{sgn}(\beta_j) \begin{cases} 1 - \frac{|\beta_j|}{\lambda_1 r} & |\beta_j| \leq \lambda_1 r \\ 0 & |\beta_j| > \lambda_1 r, \end{cases} + \lambda_2 J_{jj} \beta_j + \lambda_2 \Delta_j^{(t)}, \end{aligned}$$

where

$$\varphi_j^{(t)} = \frac{1}{n} \left( \tilde{\mathbf{X}}_j^{(t)} \right)' \mathbf{res}_{-j}^{(t)}, \quad \chi_j^{(t)} = \frac{1}{n} \left( \tilde{\mathbf{X}}_j^{(t)} \right)' \tilde{\mathbf{X}}_j^{(t)}, \quad \Delta_j^{(t)} = \sum_{l=1}^{j-1} \beta_l^{(t)} J_{jl} + \sum_{l=j+1}^p \beta_l^{(t-1)} J_{jl}.$$

By setting the first order derivative equal to zero, we have

$$\beta_j^{(t)} = \begin{cases} \frac{\text{ST}\left(\frac{\varphi_j^{(t)} - \lambda_2 \Delta_j^{(t)}}{\chi_j^{(t)} + \lambda_2 J_{jj} - \frac{1}{r}}, \lambda_1\right)}{\frac{\varphi_j^{(t)} - \lambda_2 \Delta_j^{(t)}}{\chi_j^{(t)} + \lambda_2 J_{jj}}} & \left| \frac{\varphi_j^{(t)} - \lambda_2 \Delta_j^{(t)}}{\chi_j^{(t)} + \lambda_2 J_{jj}} \right| \leq \lambda_1 r (\chi_j^{(t)} + \lambda_2 J_{jj}) \\ \frac{\varphi_j^{(t)} - \lambda_2 \Delta_j^{(t)}}{\chi_j^{(t)} + \lambda_2 J_{jj}} & \left| \frac{\varphi_j^{(t)} - \lambda_2 \Delta_j^{(t)}}{\chi_j^{(t)} + \lambda_2 J_{jj}} \right| > \lambda_1 r (\chi_j^{(t)} + \lambda_2 J_{jj}) \end{cases},$$

where  $\text{ST}(\nu, \lambda_1) = \text{sgn}(\nu)(|\nu| - \lambda_1)_+$  is the soft-thresholding operator.

### 1.2.2 Convergence of the proposed algorithm

We now consider convergence of the proposed coordinate descent-based algorithm. A similar algorithm has been adopted in Choi et al. (2010), which has demonstrated satisfactory convergence and numerical performance. Convergence of the CD algorithm for MCP has been studied in Breheny and Huang (2011). Specifically, with  $\boldsymbol{\gamma}$  and  $\boldsymbol{\alpha}$  fixed at  $\boldsymbol{\gamma}^{(t-1)}$  and  $\boldsymbol{\alpha}^{(t-1)}$ , the objective function with respect to  $\boldsymbol{\beta}$  can be rewritten as

$$Q(\boldsymbol{\beta}) = \frac{1}{2n} \left\| \tilde{\mathbf{Y}}^{(t)} - \tilde{\mathbf{X}}^{(t)} \boldsymbol{\beta} \right\|_2^2 + \sum_{j=1}^p \rho(|\beta_j|; \lambda_1, r) + \frac{1}{2} \lambda_2 \boldsymbol{\beta}' \mathbf{J} \boldsymbol{\beta}, \quad (6)$$

where  $\tilde{\mathbf{Y}}^{(t)} = \mathbf{Y} - \mathbf{Z} \boldsymbol{\alpha}^{(t-1)}$  and  $\tilde{\mathbf{X}}^{(t)} = \mathbf{X} + \sum_{k=1}^q \mathbf{W}^{(k)} \odot \left( \mathbf{1}_{n \times 1} \left( \boldsymbol{\gamma}_k^{(t-1)} \right)' \right)$  with  $\mathbf{1}_{n \times 1} = (1, \dots, 1)_{n \times 1}$ . Then, we have the following proposition.

**Proposition 1:** Let  $c_*(\boldsymbol{\gamma})$  denote the minimum eigenvalue of  $\frac{1}{n} \left( \tilde{\mathbf{X}}^{(t)} \right)' \tilde{\mathbf{X}}^{(t)} + \lambda_2 \mathbf{J}$ . Then the objective function defined in (3) is a convex function of  $\boldsymbol{\beta}$  when  $r > 1/c_*(\boldsymbol{\gamma})$ .

Proof: The objective function possesses directional derivatives and second directional derivatives at all points  $\beta$  and in all directions  $\mathbf{u}_p$  for  $\beta$ , although it is not differentiable. Denote  $d_{\mathbf{u}}Q$  and  $d_{\mathbf{u}}^2Q$  as the derivative and second derivative of  $Q$  in the direction  $\mathbf{u}$ . Then, for all  $\beta$ , we have

$$\min_{\mathbf{u}}\{d_{\mathbf{u}}^2Q(\beta)\} \geq \frac{1}{n} \left( \tilde{\mathbf{X}}^{(t)} \right)' \tilde{\mathbf{X}}^{(t)} + \lambda_2 \mathbf{J} - \frac{1}{r} \mathbf{I}.$$

This completes the proof of Proposition 1.

According to Lemma 1, Propositions 1 and 2 in Breheny and Huang (2011), and Theorems 4.1 and 5.1 in Tseng (2001), with the convexity, the value of the objective function decreases at each step and converges to a coordinate-wise minimum when  $r > 1/c_*(\gamma)$ . Furthermore, because all directional derivatives exist, every coordinate-wise minimum is also a local minimum. The same conclusion can be drawn for  $\gamma$ . Therefore, with a large enough value of  $r$ , the proposed algorithm is guaranteed to converge.

### 1.2.3 Computational cost

In the proposed algorithm, the most time-consuming are Steps 2 and 3. Here, following Friedman et al. (2010),  $\mathbf{res}^{(t)}$  is introduced to improve efficiency. Suppose that there are  $\tilde{s}_\beta$  nonzero G effects in the model. With the hierarchical constraint, updating for each main G factor or interaction costs at most  $O(\max(n, \tilde{s}_\beta))$  operations. Thus, a complete cycle through all  $p + q + \tilde{s}_\beta q$  variables costs at most  $O(\max(n, \tilde{s}_\beta)(p + q + \tilde{s}_\beta q))$  operations. The space consumption is mainly for storing matrices  $\mathbf{Z}, \mathbf{X}, \mathbf{W}^{(1)}, \dots, \mathbf{W}^{(q)}$  and initializing  $\theta$ , leading to complexity  $O((n+1)(p+q+pq))$ . For example, consider  $q = 5$  and  $p = 5000$ . With fixed tuning parameters, for a simulated dataset with  $n = 250$  and a continuous outcome, the average computer time is 23.15 seconds. For a simulated dataset with  $n = 350$  and a censored survival outcome with a censoring rate 20%, the proposed analysis takes about 28.54 seconds.

### 1.2.4 Parameter path

To produce a parameter path, for each value of  $\lambda_2$  in a sensible range, we compute solutions for a decreasing sequence of values for  $\lambda_1$ , starting at the smallest  $\lambda_{1,\max}$  at which all penalized coefficients are zero. With the hierarchical constraint, it suffices to examine  $\lambda_{1,\max}$  for  $\beta$ . As shown in (4), when  $\beta = 0$ ,  $\beta_j$  will stay zero if  $\frac{1}{n} \left| \left( \tilde{\mathbf{X}}_j \right)' \tilde{\mathbf{Y}}^{(t)} \right| < \lambda_1$ . With Step 1 and the definitions of  $\tilde{\mathbf{X}}_j$  and  $\tilde{\mathbf{Y}}^{(t)}$ ,  $\lambda_{1,\max}$  can be calculated as  $\max_j \frac{1}{n} \left| \mathbf{X}'_j (\mathbf{Y} - \mathbf{Z}(\mathbf{Z}'\mathbf{Z})^{-1}\mathbf{Z}'\mathbf{Y}) \right|$ . Following the literature (Friedman et al., 2010), we select a minimum value  $\lambda_{1,\min} = 0.001\lambda_{1,\max}$  and construct a decreasing sequence of 50  $\lambda_1$ -values on the log-scale. The estimates from the previous value of  $\lambda_1$  are used as warm starts for the next one to speed up computation as well as improve stability.

We simulate one replicate under the linear model with MAF setting M1 and correlation structure AR(0.3). Details on the data settings are described in Section 3 (main text). With the proposed approach, we first examine the values of BIC as a function of  $\lambda_1$  and  $\lambda_2$  in Web Figure 1. The optimal point with  $(\lambda_1, \lambda_2) = (0.135, 0.095)$  is clearly identified. We further examine the parameter paths in Web Figure 2. The proposed approach is observed to have parameter paths similar to those of other penalized estimations. The model is sparser with larger  $\lambda_1$  and smoother with larger  $\lambda_2$ . For this simulated dataset, with the optimal tuning parameters, the proposed approach can correctly identify the majority of true positives while having a small number of false positives.

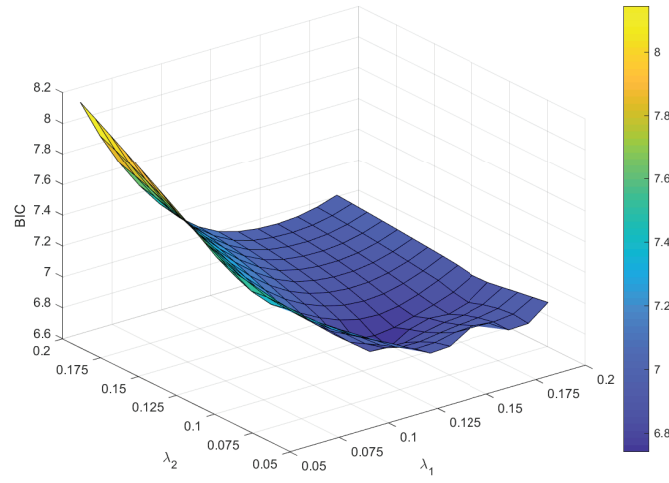

Web Figure 1: Simulation: BIC as a function of  $\lambda_1$  and  $\lambda_2$

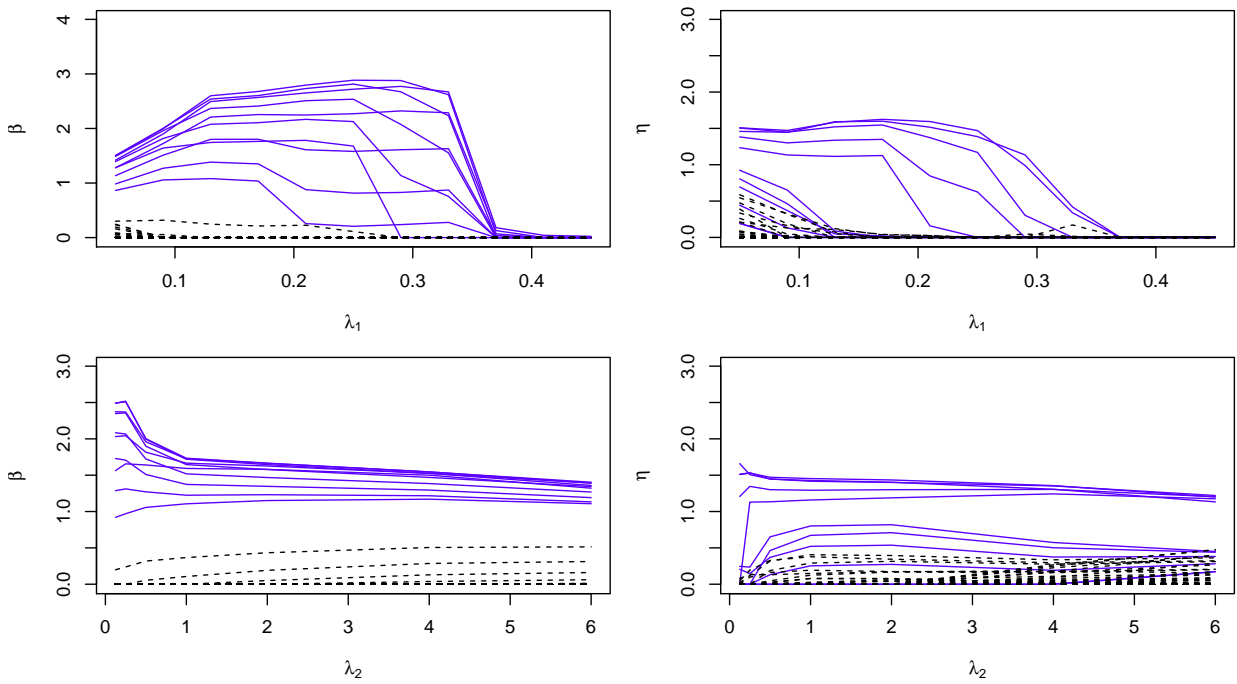

Web Figure 2: Simulation: parameter paths for one replicate under the linear model with MAF setting M1 and correlation structure AR(0.3). The blue solid lines represent the first ten true positives, and the black dashed lines represent the true negatives.

### 1.3 Conditions for Theorems 1 and 2

(C1) Components of the residual  $\boldsymbol{\varepsilon}$  are i.i.d and sub-Gaussian with noise level  $\sigma$ . That is, for any vector  $\boldsymbol{\nu}$  with  $\|\boldsymbol{\nu}\|_2 = 1$  and any constant  $\epsilon > 0$ ,  $P(|\boldsymbol{\nu}'\boldsymbol{\varepsilon}| \geq \epsilon) \leq 2 \exp\left(-\frac{\epsilon^2}{2\sigma^2}\right)$ .

(C2) Let  $b_0 = \min\left\{\left\{|\beta_j^0| : j \in \mathcal{A}_1\right\}, \left\{|\gamma_{kj}^0| : j \in \mathcal{A}_2^k, k = 1, \dots, q\right\}\right\}$ . Then,  $b_0\sqrt{n/s} \rightarrow \infty$ .

(C3) Denote  $\lambda_{\min}(\mathbf{M})$  and  $\lambda_{\max}(\mathbf{M})$  as the smallest and largest eigenvalues of  $\mathbf{M}$ . Then,

$$\max_{\boldsymbol{\theta}_{\mathcal{A}} \in \mathcal{N}_0} \lambda_{\max} \left( \frac{1}{n} \mathbf{G}(\boldsymbol{\beta}_{\mathcal{A}_2}, \boldsymbol{\gamma}_{\mathcal{A}_1})' \mathbf{G}(\boldsymbol{\beta}_{\mathcal{A}_2}, \boldsymbol{\gamma}_{\mathcal{A}_1}) \right) \leq s\bar{c},$$

$$\min_{\boldsymbol{\theta}_{\mathcal{A}} \in \mathcal{N}_0} \lambda_{\min} \left( \frac{1}{n} \mathbf{G}(\boldsymbol{\beta}_{\mathcal{A}_2}, \boldsymbol{\gamma}_{\mathcal{A}_1})' \mathbf{G}(\boldsymbol{\beta}_{\mathcal{A}_2}, \boldsymbol{\gamma}_{\mathcal{A}_1}) + \frac{1}{n} \mathbf{F}(\boldsymbol{\theta}_{\mathcal{A}}) \right) \geq \underline{c},$$

where  $\boldsymbol{\gamma}_{\mathcal{A}_1} = (\boldsymbol{\gamma}'_{1,\mathcal{A}_1}, \dots, \boldsymbol{\gamma}'_{q,\mathcal{A}_1})'$  with  $\gamma_{kj} = 0$ , if  $j \in \mathcal{A}_1$  but  $j \notin \mathcal{A}_2^k$ ,  $\mathbf{G}(\boldsymbol{\beta}_{\mathcal{A}_2}, \boldsymbol{\gamma}_{\mathcal{A}_1}) = (\mathbf{Z}, \mathbf{U}(\boldsymbol{\gamma}_{\mathcal{A}_1}), \mathbf{V}^{(1)}(\boldsymbol{\beta}_{\mathcal{A}_2^1}), \mathbf{V}^{(2)}(\boldsymbol{\beta}_{\mathcal{A}_2^2}), \dots, \mathbf{V}^{(q)}(\boldsymbol{\beta}_{\mathcal{A}_2^q}))_{n \times (q+s)}$  with  $\mathbf{U}(\boldsymbol{\gamma}_{\mathcal{A}_1}) = \mathbf{X}_{\mathcal{A}_1} + \sum_{k=1}^q \mathbf{W}_{\mathcal{A}_1}^{(k)} \odot (\mathbf{1}_{n \times 1} (\boldsymbol{\gamma}_{k,\mathcal{A}_1})')$  and  $\mathbf{V}^{(k)}(\boldsymbol{\beta}_{\mathcal{A}_2^k}) = \mathbf{W}_{\mathcal{A}_2^k}^{(k)} \odot (\mathbf{1}_{n \times 1} (\boldsymbol{\beta}_{\mathcal{A}_2^k})')$ ,  $\mathbf{F}(\boldsymbol{\theta}_{\mathcal{A}}) = (f_{jl}(\boldsymbol{\theta}_{\mathcal{A}}))_{(q+s) \times (q+s)}$  with  $f_{jl}(\boldsymbol{\theta}_{\mathcal{A}}) = -(\mathbf{W}_{\zeta}^{(k)})' (\mathbf{Y} - \mathbf{Z}\boldsymbol{\alpha} - \mathbf{X}_{\mathcal{A}_1}\boldsymbol{\beta}_{\mathcal{A}_1} - \sum_{g=1}^q \mathbf{W}_{\mathcal{A}_2^g}^{(g)}(\boldsymbol{\beta}_{\mathcal{A}_2^g} \odot \boldsymbol{\gamma}_{g,\mathcal{A}_2^g}))$  if both  $j$  and  $l$  correspond to the  $\zeta$ th element of  $\mathcal{A}_2^k$ , and 0 otherwise,  $\mathcal{N}_0 = \{\boldsymbol{\theta}_{\mathcal{A}} : \|\boldsymbol{\theta}_{\mathcal{A}} - \boldsymbol{\theta}_{\mathcal{A}}^0\|_{\infty} \leq \frac{b_0}{2}\}$ , and  $\bar{c}$  and  $\underline{c}$  are two positive constants.

(C4)  $\lambda_2 = O(\sqrt{1/n})$ .

(C5)  $\lambda_{\min}(\tilde{\mathbf{J}}_{\mathcal{A},\mathcal{A}}) \geq 0$  and  $\|\tilde{\mathbf{J}}_{\mathcal{A},\mathcal{A}}\boldsymbol{\theta}_{\mathcal{A}}^0\|_2 = O(\sqrt{s})$ , where  $\tilde{\mathbf{J}}_{\mathcal{A},\mathcal{A}} = \text{diag}(\mathbf{0}_{q \times q}, \mathbf{J}_{\mathcal{A}_1,\mathcal{A}_1}, \dots, \mathbf{J}_{\mathcal{A}_2^q,\mathcal{A}_2^q})$  is a block diagonal matrix with the diagonal blocks being  $\mathbf{0}_{q \times q}$ ,  $\mathbf{J}_{\mathcal{A}_1,\mathcal{A}_1}$ ,  $\dots$ , and  $\mathbf{J}_{\mathcal{A}_2^q,\mathcal{A}_2^q}$ .

(C6)  $\|\mathbf{U}(\boldsymbol{\gamma}_{\mathcal{A}_1}^0)' \mathbf{G}(\boldsymbol{\beta}_{\mathcal{A}_2}^0, \boldsymbol{\gamma}_{\mathcal{A}_1}^0)\|_{2,\infty} = O(n)$ ,  $\left\| \mathbf{V}^{(k)}(\boldsymbol{\beta}_{\mathcal{A}_2^k}^0)' \mathbf{G}(\boldsymbol{\beta}_{\mathcal{A}_2}^0, \boldsymbol{\gamma}_{\mathcal{A}_1}^0) \right\|_{2,\infty} = O(n)$ ,  $\|\mathbf{U}(\boldsymbol{\gamma}_j^0)\|_2 = O(\sqrt{n})$ ,  $\|\mathbf{V}^{(k)}(\boldsymbol{\beta}_j^0)\|_2 = O(\sqrt{n})$ ,  $j = 1, \dots, p$ , where for  $\mathbf{M}$ ,  $\|\mathbf{M}\|_{2,\infty} = \max_{\|\boldsymbol{\nu}\|_2=1} \|\mathbf{M}\boldsymbol{\nu}\|_{\infty}$ .  $\max_{\boldsymbol{\theta}_{\mathcal{A}} \in \mathcal{N}_0} \max_j \lambda_{\max}(\mathbf{T}_1^{(j)}(\boldsymbol{\gamma}_j)) = O(n)$ , where  $\mathbf{T}_1^{(j)}(\boldsymbol{\gamma}_j) = (t_{lh}^{(j)}(\boldsymbol{\gamma}_j))_{(q+s) \times (q+s)}$  with  $t_{lh}^{(j)}(\boldsymbol{\gamma}_j) = \left( \mathbf{X}_j + \sum_{g=1}^q \mathbf{W}_j^{(g)} \boldsymbol{\gamma}_{gj} \right)' \mathbf{W}_{\zeta}^{(k)}$  if both  $l$  and  $h$  correspond to the  $\zeta$ th element of  $\mathcal{A}_2^k$ , and 0 otherwise.  $\max_{\boldsymbol{\theta}_{\mathcal{A}} \in \mathcal{N}_0} \max_j \lambda_{\max}(\mathbf{T}_2^{(j)}(\boldsymbol{\beta}_j)) = O(n)$ , where  $\mathbf{T}_2^{(j)}(\boldsymbol{\beta}_j) = (t_{lh}^{(j)}(\boldsymbol{\beta}_j))_{(q+s) \times (q+s)}$  with



$t_{lh}^{(j)}(\beta_j) = \left(\mathbf{W}_j^{(k)}\beta_j\right)' \mathbf{W}_\zeta^{(k)}$  if both  $l$  and  $h$  correspond to the  $\zeta$ th element of  $\mathcal{A}_2^k$ , and 0 otherwise.

(C7)  $\log(p) = n^a, a \in (0, \frac{1}{2})$ .

(C8)  $\frac{\lambda_1}{\sqrt{s/n}} \rightarrow \infty, \frac{\lambda_1}{n^{a/2-1/2}\sqrt{\log n}} \rightarrow \infty$ .

(C9)  $b_0\lambda_1^{-1} \rightarrow \infty$ .

Condition (C1) is the sub-Gaussian condition which is assumed in Fan and Lv (2011), Guo et al. (2016), Huang et al. (2017), and others. Condition (C2) puts a lower bound on the size of the smallest signal, and allows the nonzero effects to vanish asymptotically but at a rate that is not faster than  $\sqrt{n/s}$ . Condition (C3) assumes that the predictor matrix is “well behaved”. Compared to the common predictor matrix-based assumptions, Condition (C3) may be slightly more complicated due to the decomposition strategy for accommodating the hierarchy. If model (1) (Main Text) is applied directly without the decomposition of  $\eta_{kj}$ , Condition (C3) goes back to nearly the same as Condition (A1) in Zou and Zhang (2009), where  $\mathbf{G} = \left(\mathbf{Z}, \mathbf{X}_{\mathcal{A}_1}, \mathbf{W}_{\mathcal{A}_2^1}^{(1)}, \dots, \mathbf{W}_{\mathcal{A}_2^q}^{(q)}\right)$  and  $\mathbf{F}(\boldsymbol{\theta}_{\mathcal{A}}) = 0$ . Similar conditions have also been assumed in Fan and Lv (2011) and others. Condition (C4) restricts the rate of  $\lambda_2$ . Condition (C5) makes a weak constraint on  $\mathbf{J}$ . It needs to be checked on a case-by-case basis, as  $\mathbf{J}$  may vary across data. Conditions (C2) and (C5) are not difficult to be satisfied simultaneously. Take the spline type penalty for SNP data as an example. As shown in Main Text,  $\mathbf{J}$  is symmetric and has  $\max |J_{jl}| = 6$  and  $|\{j : J_{jl} \neq 0\}| \leq 5, l = 1, \dots, p$ . Denote  $b_1 = \max \left\{ \left\{ |\beta_j^0| : j \in \mathcal{A}_1 \right\}, \left\{ |\gamma_{kj}^0| : j \in \mathcal{A}_2^k, k = 1, \dots, q \right\} \right\}$ , then we have  $\|\tilde{\mathbf{J}}_{\mathcal{A}, \mathcal{A}} \boldsymbol{\theta}_{\mathcal{A}}^0\|_2 \leq 30\sqrt{s}b_1$ . With Condition (C5), we have  $b_1 = O(1)$  which is clearly able to be satisfied together with  $b_0\sqrt{n/s} \rightarrow \infty$ . In addition, if matrix  $\mathbf{J}$  is an identity matrix, the proposed structure-based penalty goes back to ridge. Two similar conditions have been assumed in Condition (A6) in Zou and Zhang (2009) for adaptive elastic net. For the Laplacian type penalty, it is also satisfied for example when the network is sparse. Condition (C6) is similar to Condition 4 in Fan and Lv (2011), where the

first two equations control the “correlations” between the unimportant variables (those in  $\mathcal{A}_1^c$  and  $(\tilde{\mathcal{A}}_2^k)^c$ ) and important variables (those in  $\mathcal{A}_1$  and  $\mathcal{A}_2$ ). Condition (C7) allows the number of G factors to increase as the sample size increases. Condition (C8) has also been assumed in Fan and Lv (2011) and others. Condition (C9) provides the rate at which the nonzero coefficients can be distinguished from zero (Huang et al., 2017).

In the objective function,  $\lambda_1$  controls the sparsity of coefficients. Both Conditions (C7) and (C8) concern the order of  $\lambda_1$ , indicating that it is related to  $\log(p)$ . For the minimum signal  $b_0$ , with additional Conditions (C2) and (C9), we also have that  $b_0$  depends on  $\log(p)$ . Similar assumptions have been made in Condition 5 in Fan and Lv (2011).  $\lambda_2$  plays a different role, and controls the smoothness of coefficients based on the structure of G factors, with a larger value leading to smoother estimates. Condition (C4) is partly motivated by those in Huang et al. (2011), Guo et al. (2016), and others. Guo et al. (2016) suggests that the optimal level of  $\lambda_2$  can be obtained with assumptions on the smoothness of coefficients. We note that the order of  $\sqrt{1/n}$  is slightly stronger than those in Huang et al. (2011) and Guo et al. (2016). However, as interaction analysis with hierarchy is more challenging than the aforementioned main effect analysis, we assume  $O(\sqrt{1/n})$  to facilitate a less complicated proof, and the rigorous proof in the following sections can demonstrate its rationality.

## 1.4 Proof of Theorem 1

To prove Theorem 1, it suffices to show that under conditions (C1)-(C5), for a given  $\xi$ ,

$$P \left\{ \inf_{\boldsymbol{\theta}_{\mathcal{A}} \in \mathcal{N}_1} \tilde{Q}_n(\boldsymbol{\theta}_{\mathcal{A}}) > \tilde{Q}_n(\boldsymbol{\theta}_{\mathcal{A}}^0) \right\} \geq 1 - \xi,$$

where  $\mathcal{N}_1 = \{\boldsymbol{\theta}_{\mathcal{A}} : \|\boldsymbol{\theta}_{\mathcal{A}} - \boldsymbol{\theta}_{\mathcal{A}}^0\|_2 = \delta_n\}$ .

Let  $\mathbf{w} = \left( \mathbf{g}'_{q \times 1}, \mathbf{u}'_{|\mathcal{A}_1| \times 1}, \mathbf{v}'_{1_{|\mathcal{A}_2^1|} \times 1}, \dots, \mathbf{v}'_{q_{|\mathcal{A}_2^q|} \times 1} \right)'$  with  $\|\mathbf{w}\|_2 = 1$  and  $\boldsymbol{\theta}_{\mathcal{A}} = \boldsymbol{\theta}_{\mathcal{A}}^0 + \delta_n \mathbf{w}$ . Let  $L_n(\boldsymbol{\theta}_{\mathcal{A}}) = \left\| \mathbf{Y} - \mathbf{Z}\boldsymbol{\alpha} - \mathbf{X}_{\mathcal{A}_1} \boldsymbol{\beta}_{\mathcal{A}_1} - \sum_{k=1}^q \mathbf{W}_{\mathcal{A}_2^k}^{(k)}(\boldsymbol{\beta}_{\mathcal{A}_2^k} \odot \boldsymbol{\gamma}_{k, \mathcal{A}_2^k}) \right\|_2^2$ , then

$$\begin{aligned} D_n(\mathbf{w}) &= \tilde{Q}_n(\boldsymbol{\theta}_{\mathcal{A}}^0 + \delta_n \mathbf{w}) - \tilde{Q}_n(\boldsymbol{\theta}_{\mathcal{A}}^0) \\ &= \frac{1}{2n} L_n(\boldsymbol{\theta}_{\mathcal{A}}^0 + \delta_n \mathbf{w}) - \frac{1}{2n} L_n(\boldsymbol{\theta}_{\mathcal{A}}^0) \\ &\quad + \frac{1}{2} \lambda_2 (\boldsymbol{\beta}_{\mathcal{A}_1}^0 + \delta_n \mathbf{u})' \mathbf{J}_{\mathcal{A}_1, \mathcal{A}_1} (\boldsymbol{\beta}_{\mathcal{A}_1}^0 + \delta_n \mathbf{u}) - \frac{1}{2} \lambda_2 (\boldsymbol{\beta}_{\mathcal{A}_1}^0)' \mathbf{J}_{\mathcal{A}_1, \mathcal{A}_1} \boldsymbol{\beta}_{\mathcal{A}_1}^0 \\ &\quad + \frac{1}{2} \lambda_2 \sum_{k=1}^q (\boldsymbol{\gamma}_{\mathcal{A}_2^k}^0 + \delta_n \mathbf{v}_k)' \mathbf{J}_{\mathcal{A}_2^k, \mathcal{A}_2^k} (\boldsymbol{\gamma}_{\mathcal{A}_2^k}^0 + \delta_n \mathbf{v}_k) - \frac{1}{2} \lambda_2 \sum_{k=1}^q (\boldsymbol{\gamma}_{\mathcal{A}_2^k}^0)' \mathbf{J}_{\mathcal{A}_2^k, \mathcal{A}_2^k} \boldsymbol{\gamma}_{\mathcal{A}_2^k}^0. \end{aligned}$$

We have

$$\begin{aligned} I &\triangleq \frac{1}{2n} L_n(\boldsymbol{\theta}_{\mathcal{A}}^0 + \delta_n \mathbf{w}) - \frac{1}{2n} L_n(\boldsymbol{\theta}_{\mathcal{A}}^0) \\ &= \frac{1}{2n} \delta_n \mathbf{w}' (\nabla L_n(\boldsymbol{\theta}_{\mathcal{A}}) |_{\boldsymbol{\theta}_{\mathcal{A}}^0}) + \frac{1}{4n} \delta_n^2 \mathbf{w}' (\nabla^2 L_n(\boldsymbol{\theta}_{\mathcal{A}}) |_{\tilde{\boldsymbol{\theta}}_{\mathcal{A}}}) \mathbf{w} \\ &= \delta_n \mathbf{w}' \left[ -\frac{1}{n} \mathbf{G}(\boldsymbol{\beta}_{\mathcal{A}_2}^0, \boldsymbol{\gamma}_{\mathcal{A}_1}^0)' \boldsymbol{\varepsilon} \right] \\ &\quad + \frac{1}{2} \delta_n^2 \mathbf{w}' \left[ \frac{1}{n} \mathbf{G}(\tilde{\boldsymbol{\beta}}_{\mathcal{A}_2}, \tilde{\boldsymbol{\gamma}}_{\mathcal{A}_1})' \mathbf{G}(\tilde{\boldsymbol{\beta}}_{\mathcal{A}_2}, \tilde{\boldsymbol{\gamma}}_{\mathcal{A}_1}) + \frac{1}{n} \mathbf{F}(\tilde{\boldsymbol{\theta}}_{\mathcal{A}}) \right] \mathbf{w} \\ &\triangleq I_1 + I_2, \end{aligned}$$

where  $\boldsymbol{\varepsilon} = \mathbf{Y} - \mathbf{Z}\boldsymbol{\alpha}^0 - \mathbf{X}_{\mathcal{A}_1} \boldsymbol{\beta}_{\mathcal{A}_1}^0 - \sum_{k=1}^q \mathbf{W}_{\mathcal{A}_2^k}^{(k)}(\boldsymbol{\beta}_{\mathcal{A}_2^k}^0 \odot \boldsymbol{\gamma}_{k, \mathcal{A}_2^k}^0)$ ,  $\boldsymbol{\gamma}_{\mathcal{A}_1} = (\boldsymbol{\gamma}'_{1, \mathcal{A}_1}, \dots, \boldsymbol{\gamma}'_{q, \mathcal{A}_1})'$  with  $\gamma_{kj} = 0$ , if  $j \in \mathcal{A}_1$  but  $j \notin \mathcal{A}_2^k$ ,

$$\mathbf{G}(\boldsymbol{\beta}_{\mathcal{A}_2}, \boldsymbol{\gamma}_{\mathcal{A}_1}) = \left( \mathbf{Z}, \mathbf{U}(\boldsymbol{\gamma}_{\mathcal{A}_1}), \mathbf{V}^{(1)}(\boldsymbol{\beta}_{\mathcal{A}_2^1}), \mathbf{V}^{(2)}(\boldsymbol{\beta}_{\mathcal{A}_2^2}), \dots, \mathbf{V}^{(q)}(\boldsymbol{\beta}_{\mathcal{A}_2^q}) \right)_{n \times (q+s)},$$

with

$$\mathbf{U}(\boldsymbol{\gamma}_{\mathcal{A}_1}) = \mathbf{X}_{\mathcal{A}_1} + \sum_{k=1}^q \mathbf{W}_{\mathcal{A}_1}^{(k)} \odot (\mathbf{1}_{n \times 1} (\boldsymbol{\gamma}_{k, \mathcal{A}_1})'), \quad \mathbf{V}^{(k)}(\boldsymbol{\beta}_{\mathcal{A}_2^k}) = \mathbf{W}_{\mathcal{A}_2^k}^{(k)} \odot \left( \mathbf{1}_{n \times 1} (\boldsymbol{\beta}_{\mathcal{A}_2^k})' \right),$$

$\mathbf{F}(\boldsymbol{\theta}_{\mathcal{A}}) = (f_{jl}(\boldsymbol{\theta}_{\mathcal{A}}))_{(q+s) \times (q+s)}$  with  $f_{jl}(\boldsymbol{\theta}_{\mathcal{A}}) = -\left(\mathbf{W}_{\zeta}^{(k)}\right)' (\mathbf{Y} - \mathbf{Z}\boldsymbol{\alpha} - \mathbf{X}_{\mathcal{A}_1}\boldsymbol{\beta}_{\mathcal{A}_1} - \sum_{g=1}^q \mathbf{W}_{\mathcal{A}_2^g}^{(g)}(\boldsymbol{\beta}_{\mathcal{A}_2^g} \odot \boldsymbol{\gamma}_{g, \mathcal{A}_2^g}))$  if both  $j$  and  $l$  correspond to the  $\zeta$ th element of  $\mathcal{A}_2^k$ , and 0 otherwise, and  $\tilde{\boldsymbol{\theta}}_{\mathcal{A}}$  lies on the line segment connecting  $\boldsymbol{\theta}_{\mathcal{A}}$  and  $\boldsymbol{\theta}_{\mathcal{A}}^0$ . Moreover,

$$\begin{aligned} II &\triangleq \frac{1}{2}\lambda_2(\boldsymbol{\beta}_{\mathcal{A}_1}^0 + \delta_n \mathbf{u})' \mathbf{J}_{\mathcal{A}_1, \mathcal{A}_1}(\boldsymbol{\beta}_{\mathcal{A}_1}^0 + \delta_n \mathbf{u}) - \frac{1}{2}\lambda_2(\boldsymbol{\beta}_{\mathcal{A}_1}^0)' \mathbf{J}_{\mathcal{A}_1, \mathcal{A}_1} \boldsymbol{\beta}_{\mathcal{A}_1}^0 \\ &+ \frac{1}{2}\lambda_2 \sum_{k=1}^q (\boldsymbol{\gamma}_{\mathcal{A}_2^k}^0 + \delta_n \mathbf{v}_k)' \mathbf{J}_{\mathcal{A}_2^k, \mathcal{A}_2^k}(\boldsymbol{\gamma}_{\mathcal{A}_2^k}^0 + \delta_n \mathbf{v}_k) - \frac{1}{2}\lambda_2 \sum_{k=1}^q (\boldsymbol{\gamma}_{\mathcal{A}_2^k}^0)' \mathbf{J}_{\mathcal{A}_2^k, \mathcal{A}_2^k} \boldsymbol{\gamma}_{\mathcal{A}_2^k}^0 \\ &= \delta_n \lambda_2 \mathbf{w}' \tilde{\mathbf{J}}_{\mathcal{A}, \mathcal{A}} \boldsymbol{\theta}_{\mathcal{A}}^0 + \frac{1}{2} \delta_n^2 \lambda_2 \mathbf{w}' \tilde{\mathbf{J}}_{\mathcal{A}, \mathcal{A}} \mathbf{w} \\ &\geq -\delta_n \lambda_2 \|\tilde{\mathbf{J}}_{\mathcal{A}, \mathcal{A}} \boldsymbol{\theta}_{\mathcal{A}}^0\|_2, \end{aligned}$$

where  $\tilde{\mathbf{J}}_{\mathcal{A}, \mathcal{A}} = \text{diag}(\mathbf{0}_{q \times q}, \mathbf{J}_{\mathcal{A}_1, \mathcal{A}_1}, \dots, \mathbf{J}_{\mathcal{A}_2^q, \mathcal{A}_2^q})$  is a block diagonal matrix with the diagonal blocks being  $\mathbf{0}_{q \times q}, \mathbf{J}_{\mathcal{A}_1, \mathcal{A}_1}, \dots$ , and  $\mathbf{J}_{\mathcal{A}_2^g, \mathcal{A}_2^g}$ , and  $\frac{1}{2} \delta_n^2 \lambda_2 \mathbf{w}' \tilde{\mathbf{J}}_{\mathcal{A}, \mathcal{A}} \mathbf{w} \geq \frac{1}{2} \delta_n^2 \lambda_2 \lambda_{\min}(\tilde{\mathbf{J}}_{\mathcal{A}, \mathcal{A}}) \geq 0$  with condition (C5).

With  $\delta_n = \frac{4\lambda_2 \|\tilde{\mathbf{J}}_{\mathcal{A}, \mathcal{A}} \boldsymbol{\theta}_{\mathcal{A}}^0\|_2}{\underline{c}} + E\sqrt{s/n}$ , and Conditions (C2), (C4) and (C5), we have

$$\|\tilde{\boldsymbol{\theta}}_{\mathcal{A}} - \boldsymbol{\theta}_{\mathcal{A}}^0\|_{\infty} \leq \|\boldsymbol{\theta}_{\mathcal{A}} - \boldsymbol{\theta}_{\mathcal{A}}^0\|_{\infty} \leq \delta_n < b_0/2.$$

Then, with Condition (C3), we have

$$I_2 \geq \frac{1}{2} \delta_n^2 \underline{c} > 0.$$

For  $I_1$ , with Conditions (C1) and (C3), we have

$$\begin{aligned} &P\left(\delta_n \mathbf{w}' \left[-\frac{1}{n} \mathbf{G}(\boldsymbol{\beta}_{\mathcal{A}_2}^0, \boldsymbol{\gamma}_{\mathcal{A}_1}^0)' \boldsymbol{\varepsilon}\right] \leq -\delta_n \epsilon\right) \\ &= P\left(\frac{\mathbf{w}' \left[-\frac{1}{n} \mathbf{G}(\boldsymbol{\beta}_{\mathcal{A}_2}^0, \boldsymbol{\gamma}_{\mathcal{A}_1}^0)' \boldsymbol{\varepsilon}\right]}{\left\|\mathbf{w}' \left[-\frac{1}{n} \mathbf{G}(\boldsymbol{\beta}_{\mathcal{A}_2}^0, \boldsymbol{\gamma}_{\mathcal{A}_1}^0)'\right]\right\|_2} \leq -\frac{\epsilon}{\left\|\mathbf{w}' \left[-\frac{1}{n} \mathbf{G}(\boldsymbol{\beta}_{\mathcal{A}_2}^0, \boldsymbol{\gamma}_{\mathcal{A}_1}^0)'\right]\right\|_2}\right) \\ &\leq \exp\left(-\frac{n\epsilon^2}{2\sigma^2 \bar{c}_s}\right). \end{aligned}$$

Setting  $\epsilon = \frac{1}{4} \underline{c} \delta_n$ , we have

$$P\left(\delta_n \mathbf{w}' \left[-\frac{1}{n} \mathbf{G}(\boldsymbol{\beta}_{\mathcal{A}_2}^0, \boldsymbol{\gamma}_{\mathcal{A}_1}^0)' \boldsymbol{\varepsilon}\right] \geq -\frac{1}{4} \underline{c} \delta_n^2\right) \geq 1 - \exp\left(-\frac{n\underline{c}^2 \delta_n^2}{32\sigma^2 \bar{c}_s}\right).$$

Thus, with  $\delta_n = \frac{4\lambda_2\|\tilde{\mathbf{J}}_{\mathcal{A},\mathcal{A}}\boldsymbol{\theta}_{\mathcal{A}}^0\|_2}{\underline{c}} + E\sqrt{s/n}$ , we have

$$\begin{aligned}
P\left\{\inf_{\hat{\boldsymbol{\theta}}\in\mathcal{N}_1} Q_n(\hat{\boldsymbol{\theta}}) > Q_n(\boldsymbol{\theta}^0)\right\} &\geq P\{D_n(\mathbf{w}) > 0\} \\
&\geq P\left\{\delta_n\mathbf{w}'\left[-\frac{1}{n}\mathbf{G}(\boldsymbol{\beta}_{\mathcal{A}_2}^0, \boldsymbol{\gamma}_{\mathcal{A}_1}^0)'\boldsymbol{\varepsilon}\right] + \frac{1}{2}\delta_n^2\underline{c} - \delta_n\lambda_2\|\tilde{\mathbf{J}}_{\mathcal{A},\mathcal{A}}\boldsymbol{\theta}_{\mathcal{A}}^0\|_2 > 0\right\} \\
&\geq P\left(\delta_n\mathbf{w}'\left[-\frac{1}{n}\mathbf{G}(\boldsymbol{\beta}_{\mathcal{A}_2}^0, \boldsymbol{\gamma}_{\mathcal{A}_1}^0)'\boldsymbol{\varepsilon}\right] \geq -\frac{1}{4}\underline{c}\delta_n^2\right) \\
&\geq 1 - \exp\left(-\frac{n\underline{c}^2\delta_n^2}{32\sigma^2\bar{c}s}\right) \\
&= 1 - \exp\left(-\frac{\left[4\sqrt{n/s}\lambda_2\|\tilde{\mathbf{J}}_{\mathcal{A},\mathcal{A}}\boldsymbol{\theta}_{\mathcal{A}}^0\|_2 + E\underline{c}\right]^2}{32\sigma^2\bar{c}}\right).
\end{aligned}$$

This completes the proof of Theorem 1.

## 1.5 Proof of Theorem 2

First, consider  $\hat{\beta}_{\mathcal{A}_1^c}$ . Following Theorem 1 in Fan and Lv (2011), with Condition (C9) and Theorem 1, it suffices to check condition (8) in Fan and Lv (2011). Let

$$h_1 = (n\lambda_1)^{-1} \left[ \frac{1}{2} \nabla_{\beta_{\mathcal{A}_1^c}} L_n(\boldsymbol{\theta}) \Big|_{\hat{\boldsymbol{\theta}}} + \lambda_2 n \mathbf{J}_{\mathcal{A}_1^c} \hat{\boldsymbol{\beta}} \right].$$

Since  $\hat{\beta}_{\mathcal{A}_1^c} = 0$ , with a Taylor expansion, we have

$$\begin{aligned} h_1 &= (n\lambda_1)^{-1} \left[ -\mathbf{U}(\boldsymbol{\gamma}_{\mathcal{A}_1^c})' \left( \mathbf{Y} - \mathbf{Z}\hat{\boldsymbol{\alpha}} - \mathbf{X}\hat{\boldsymbol{\beta}} - \sum_{k=1}^q \mathbf{W}^{(k)}(\hat{\boldsymbol{\beta}} \odot \hat{\boldsymbol{\gamma}}_k) \right) + \lambda_2 n \mathbf{J}_{\mathcal{A}_1^c, \mathcal{A}_1} \hat{\boldsymbol{\beta}}_{\mathcal{A}_1} \right] \\ &= (n\lambda_1)^{-1} \left[ -\mathbf{U}(\boldsymbol{\gamma}_{\mathcal{A}_1^c}^0)' \boldsymbol{\varepsilon} + \mathbf{U}(\boldsymbol{\gamma}_{\mathcal{A}_1^c}^0)' \mathbf{G}(\boldsymbol{\beta}_{\mathcal{A}_2}^0, \boldsymbol{\gamma}_{\mathcal{A}_1}^0)' (\hat{\boldsymbol{\theta}}_{\mathcal{A}} - \boldsymbol{\theta}_{\mathcal{A}}^0) + \boldsymbol{\kappa} + \lambda_2 n \mathbf{J}_{\mathcal{A}_1^c, \mathcal{A}_1} \hat{\boldsymbol{\beta}}_{\mathcal{A}_1} \right] \\ &= (n\lambda_1)^{-1} \left[ -\mathbf{U}(\boldsymbol{\gamma}_{\mathcal{A}_1^c}^0)' \boldsymbol{\varepsilon} + III + \lambda_2 n \mathbf{J}_{\mathcal{A}_1^c, \mathcal{A}_1} \hat{\boldsymbol{\beta}}_{\mathcal{A}_1} \right]. \end{aligned}$$

For *III*, let  $m_j(\boldsymbol{\theta}_{\mathcal{A}}) = \left( \mathbf{X}_j + \sum_{k=1}^q \mathbf{W}_j^{(k)} \boldsymbol{\gamma}_{kj} \right)' \left( \mathbf{Z}\boldsymbol{\alpha} + \mathbf{X}_{\mathcal{A}_1} \boldsymbol{\beta}_{\mathcal{A}_1} + \sum_{k=1}^q \mathbf{W}_{\mathcal{A}_2^k}^{(k)} (\boldsymbol{\beta}_{\mathcal{A}_2^k} \odot \boldsymbol{\gamma}_{k, \mathcal{A}_2^k}) \right)$ . Then  $\boldsymbol{\kappa} = (\kappa_j, j \in \mathcal{A}_1^c)'$  with

$$\begin{aligned} \kappa_j &= \frac{1}{2} (\hat{\boldsymbol{\theta}}_{\mathcal{A}} - \boldsymbol{\theta}_{\mathcal{A}}^0) \left( \nabla_{\boldsymbol{\theta}_{\mathcal{A}}}^2 m_j(\boldsymbol{\theta}_{\mathcal{A}}) \Big|_{\tilde{\boldsymbol{\theta}}_{\mathcal{A}}} \right) (\hat{\boldsymbol{\theta}}_{\mathcal{A}} - \boldsymbol{\theta}_{\mathcal{A}}^0), \\ &\leq \max_j \frac{1}{2} \lambda_{\max} \left( \mathbf{T}_1^{(j)}(\tilde{\boldsymbol{\gamma}}_j) \right) \|\boldsymbol{\theta}_{\mathcal{A}}^* - \boldsymbol{\theta}_{\mathcal{A}}^0\|_2, \end{aligned}$$

where  $\tilde{\boldsymbol{\theta}}_{\mathcal{A}}$  lies on the line segment connecting  $\boldsymbol{\theta}_{\mathcal{A}}^*$  and  $\boldsymbol{\theta}_{\mathcal{A}}^0$ . Here  $\mathbf{T}_1^{(j)}(\boldsymbol{\gamma}_j) = \left( t_{lh}^{(j)}(\boldsymbol{\gamma}_j) \right)_{(q+s) \times (q+s)}$  with  $t_{lh}^{(j)}(\boldsymbol{\gamma}_j) = \left( \mathbf{X}_j + \sum_{g=1}^q \mathbf{W}_j^{(g)} \boldsymbol{\gamma}_{gj} \right)' \mathbf{W}_c^{(k)}$ , if both  $l$  and  $h$  correspond to the  $c$ th element of  $\mathcal{A}_2^k$ , and 0 otherwise. Consider the event

$$\Omega_1 = \left\{ \|\mathbf{U}(\boldsymbol{\gamma}_{\mathcal{A}_1^c}^0)' \boldsymbol{\varepsilon}\|_{\infty} \leq \zeta_n \sqrt{n} \right\},$$

with  $\zeta_n = n^a (\log(n))^{1/2}$ . With Conditions (C6) and (C7), we have

$$\begin{aligned} P(\Omega_1) &= 1 - P \left\{ \|\mathbf{U}(\boldsymbol{\gamma}_{\mathcal{A}_1^c}^0)' \boldsymbol{\varepsilon}\|_{\infty} > \zeta_n \sqrt{n} \right\} \\ &\geq 1 - \sum_{j \in \mathcal{A}_1^c} P \left\{ \|\mathbf{U}(\boldsymbol{\gamma}_j^0)' \boldsymbol{\varepsilon}\| > \zeta_n \sqrt{n} \right\} \\ &\geq 1 - 2(p - s_0) \exp \left( - \frac{\zeta_n^2 n}{2\sigma^2 \max_{j \in \mathcal{A}_1^c} \|\mathbf{U}(\boldsymbol{\gamma}_j^0)\|_2^2} \right) \end{aligned}$$

$$\geq 1 - 2p \exp\left(-\frac{\zeta_n^2 n}{2\sigma^2 \max_{j \in \mathcal{A}_1^c} \|\mathbf{U}(\boldsymbol{\gamma}_j^0)\|_2^2}\right) \rightarrow 1,$$

as  $\log(p) = O(n^a)$  and  $\|\mathbf{U}(\boldsymbol{\gamma}_j^0)\|_2 = O(\sqrt{n})$ . Thus, with probability approaching 1,

$$\|\mathbf{U}(\boldsymbol{\gamma}_{\mathcal{A}_1^c}^0)' \boldsymbol{\varepsilon}\|_\infty = O(n^{a/2+1/2} \sqrt{\log n}).$$

Then, Condition (C8) gives

$$(n\lambda_1)^{-1} \|\mathbf{U}(\boldsymbol{\gamma}_{\mathcal{A}_1^c}^0)' \boldsymbol{\varepsilon}\|_\infty = o(1).$$

For III, with Conditions (C6) and (C8),

$$\begin{aligned} (n\lambda_1)^{-1} \|III\|_\infty &= (n\lambda_1)^{-1} \left[ \|\mathbf{U}(\boldsymbol{\gamma}_{\mathcal{A}_1^c}^0)' \mathbf{G}(\boldsymbol{\beta}_{\mathcal{A}_2}^0, \boldsymbol{\gamma}_{\mathcal{A}_1}^0)' (\hat{\boldsymbol{\theta}}_{\mathcal{A}} - \boldsymbol{\theta}_{\mathcal{A}}^0)\|_\infty + \|\boldsymbol{\kappa}\|_\infty \right] \\ &= (n\lambda_1)^{-1} [O(n) \|\boldsymbol{\theta}_{\mathcal{A}}^* - \boldsymbol{\theta}_{\mathcal{A}}^0\|_2 + O(n) \|\boldsymbol{\theta}_{\mathcal{A}}^* - \boldsymbol{\theta}_{\mathcal{A}}^0\|_2^2] \\ &= O(\lambda_1^{-1} \sqrt{s/n}) = o(1). \end{aligned}$$

With Conditions (C4), (C5) and (C8),

$$\begin{aligned} (n\lambda_1)^{-1} \|\lambda_2 n \mathbf{J}_{\mathcal{A}_1^c, \mathcal{A}_1} \hat{\boldsymbol{\beta}}_{\mathcal{A}_1}\|_\infty &= (\lambda_1)^{-1} \|\lambda_2 \mathbf{J}_{\mathcal{A}_1^c, \mathcal{A}_1} \boldsymbol{\beta}_{\mathcal{A}_1}^0 - \lambda_2 \mathbf{J}_{\mathcal{A}_1^c, \mathcal{A}_1} (\hat{\boldsymbol{\beta}}_{\mathcal{A}_1} - \boldsymbol{\beta}_{\mathcal{A}_1}^0)\|_\infty \\ &\leq (\lambda_1)^{-1} \|\lambda_2 \mathbf{J}_{\mathcal{A}_1^c, \mathcal{A}_1} \boldsymbol{\beta}_{\mathcal{A}_1}^0\|_\infty + (\lambda_1)^{-1} \|\lambda_2 \mathbf{J}_{\mathcal{A}_1^c, \mathcal{A}_1} (\hat{\boldsymbol{\beta}}_{\mathcal{A}_1} - \boldsymbol{\beta}_{\mathcal{A}_1}^0)\|_\infty \\ &= O(\lambda_1^{-1} \sqrt{s/n}) = o(1). \end{aligned}$$

Next, consider  $\hat{\boldsymbol{\gamma}}_{k, (\tilde{\mathcal{A}}_2^k)^c}$ . A similar process is adopted to check condition (8) in Fan and Lv (2011). Let

$$h_2 = (n\lambda_1)^{-1} \left[ \frac{1}{2} \nabla_{(\tilde{\mathcal{A}}_2^k)^c} L_n(\boldsymbol{\theta}) \Big|_{\hat{\boldsymbol{\theta}}} + \lambda_2 n \mathbf{J}_{(\tilde{\mathcal{A}}_2^k)^c} \hat{\boldsymbol{\gamma}}_k \right].$$

Since  $\hat{\boldsymbol{\gamma}}_{(\tilde{\mathcal{A}}_2^k)^c} = 0$  and  $\hat{\boldsymbol{\beta}}_{(\tilde{\mathcal{A}}_2^k)^c} \neq 0$ , with a Taylor expansion, we have

$$\begin{aligned} h_2 &= (n\lambda_1)^{-1} \left[ -\mathbf{V}^{(k)}(\boldsymbol{\beta}_{(\tilde{\mathcal{A}}_2^k)^c})' \left( \mathbf{Y} - \mathbf{Z}\hat{\boldsymbol{\alpha}} - \mathbf{X}\hat{\boldsymbol{\beta}} - \sum_{k=1}^q \mathbf{W}^{(k)}(\hat{\boldsymbol{\beta}} \odot \hat{\boldsymbol{\gamma}}_k) \right) + \lambda_2 n \mathbf{J}_{(\tilde{\mathcal{A}}_2^k)^c} \hat{\boldsymbol{\gamma}}_k \right] \\ &= (n\lambda_1)^{-1} \left[ -\mathbf{V}^{(k)}(\boldsymbol{\beta}_{(\tilde{\mathcal{A}}_2^k)^c}^0)' \boldsymbol{\varepsilon} + \mathbf{V}^{(k)}(\boldsymbol{\beta}_{(\tilde{\mathcal{A}}_2^k)^c}^0)' \mathbf{G}(\boldsymbol{\beta}_{\mathcal{A}_2}^0, \boldsymbol{\gamma}_{\mathcal{A}_1}^0)' (\hat{\boldsymbol{\theta}}_{\mathcal{A}} - \boldsymbol{\theta}_{\mathcal{A}}^0) + \tilde{\boldsymbol{\kappa}} + \lambda_2 n \mathbf{J}_{(\tilde{\mathcal{A}}_2^k)^c} \hat{\boldsymbol{\gamma}}_k \right] \\ &= (n\lambda_1)^{-1} \left[ -\mathbf{V}^{(k)}(\boldsymbol{\beta}_{(\tilde{\mathcal{A}}_2^k)^c}^0)' \boldsymbol{\varepsilon} + IV + \lambda_2 n \mathbf{J}_{(\tilde{\mathcal{A}}_2^k)^c, \mathcal{A}_2^k} \hat{\boldsymbol{\gamma}}_{k, \mathcal{A}_2^k} \right]. \end{aligned}$$

For *IV*, let  $\tilde{m}_j(\boldsymbol{\theta}_{\mathcal{A}}) = \left(\mathbf{W}_j^{(k)}\beta_j\right)' \left(\mathbf{Z}\boldsymbol{\alpha} + \mathbf{X}_{\mathcal{A}_1}\boldsymbol{\beta}_{\mathcal{A}_1} + \sum_{k=1}^q \mathbf{W}_{\mathcal{A}_2^k}^{(k)}(\boldsymbol{\beta}_{\mathcal{A}_2^k} \odot \boldsymbol{\gamma}_{k,\mathcal{A}_2^k})\right)$ , then  $\tilde{\boldsymbol{\kappa}} = (\tilde{\kappa}_j, j \in (\tilde{\mathcal{A}}_2^k)^c)'$  with

$$\begin{aligned}\tilde{\kappa}_j &= \frac{1}{2}(\hat{\boldsymbol{\theta}}_{\mathcal{A}} - \boldsymbol{\theta}_{\mathcal{A}}^0) \left(\nabla_{\boldsymbol{\theta}_{\mathcal{A}}}^2 \tilde{m}_j(\boldsymbol{\theta}_{\mathcal{A}})\big|_{\tilde{\boldsymbol{\theta}}_{\mathcal{A}}}\right) (\hat{\boldsymbol{\theta}}_{\mathcal{A}} - \boldsymbol{\theta}_{\mathcal{A}}^0), \\ &\leq \max_j \frac{1}{2} \lambda_{\max} \left(\mathbf{T}_2^{(j)}(\tilde{\beta}_j)\right) \|\boldsymbol{\theta}_{\mathcal{A}}^* - \boldsymbol{\theta}_{\mathcal{A}}^0\|_2,\end{aligned}$$

where  $\tilde{\boldsymbol{\theta}}_{\mathcal{A}}$  lies on the line segment connecting  $\boldsymbol{\theta}_{\mathcal{A}}^*$  and  $\boldsymbol{\theta}_{\mathcal{A}}^0$ . Here  $\mathbf{T}_2^{(j)}(\beta_j) = \left(t_{lh}^{(j)}(\beta_j)\right)_{(q+s)\times(q+s)}$  with  $t_{lh}^{(j)}(\beta_j) = \left(\mathbf{W}_j^{(k)}\beta_j\right)' \mathbf{W}_{\zeta}^{(k)}$  if both  $l$  and  $h$  correspond to the  $\zeta$ th element of  $\mathcal{A}_2^k$ , and 0 otherwise.

Consider the event

$$\Omega_2 = \left\{ \|\mathbf{V}^{(k)}(\boldsymbol{\beta}_{(\tilde{\mathcal{A}}_2^k)^c}^0)' \boldsymbol{\varepsilon}\|_{\infty} \leq \zeta_n \sqrt{n} \right\},$$

with  $\zeta_n = n^a (\log(n))^{1/2}$ . We have

$$\begin{aligned}P(\Omega_2) &= 1 - P \left\{ \|\mathbf{V}^{(k)}(\boldsymbol{\beta}_{(\tilde{\mathcal{A}}_2^k)^c}^0)' \boldsymbol{\varepsilon}\|_{\infty} > \zeta_n \sqrt{n} \right\} \\ &\geq 1 - \sum_{j \in (\tilde{\mathcal{A}}_2^k)^c} P \left\{ \|\mathbf{V}^{(k)}(\beta_j^0)' \boldsymbol{\varepsilon}\| > \zeta_n \sqrt{n} \right\} \\ &\geq 1 - 2p \exp \left( -\frac{\zeta_n^2 n}{2\sigma^2 \max_{j \in (\tilde{\mathcal{A}}_2^k)^c} \|\mathbf{V}^{(k)}(\beta_j^0)\|_2^2} \right) \rightarrow 1,\end{aligned}$$

as  $\log(p) = O(n^a)$  and  $\|\mathbf{V}^{(k)}(\beta_j^0)\|_2 = O(\sqrt{n})$ . Thus, we have, with probability approaching 1,

$$\|\mathbf{V}^{(k)}(\boldsymbol{\beta}_{(\tilde{\mathcal{A}}_2^k)^c}^0)' \boldsymbol{\varepsilon}\|_{\infty} = O(n^{a/2+1/2} \sqrt{\log n}).$$

Condition (C8) gives

$$(n\lambda_1)^{-1} \|\mathbf{V}^{(k)}(\boldsymbol{\beta}_{(\tilde{\mathcal{A}}_2^k)^c}^0)' \boldsymbol{\varepsilon}\|_{\infty} = o(1).$$

For *IV*, with Conditions (C6) and (C8),

$$\begin{aligned}(n\lambda_1)^{-1} \|IV\|_{\infty} &= (n\lambda_1)^{-1} \left[ \|\mathbf{V}^{(k)}(\boldsymbol{\beta}_{(\tilde{\mathcal{A}}_2^k)^c}^0)' \mathbf{G}(\boldsymbol{\beta}_{\mathcal{A}_2}^0, \boldsymbol{\gamma}_{\mathcal{A}_1}^0)' (\hat{\boldsymbol{\theta}}_{\mathcal{A}} - \boldsymbol{\theta}_{\mathcal{A}}^0)\|_{\infty} + \|\tilde{\boldsymbol{\kappa}}\|_{\infty} \right] \\ &= (n\lambda_1)^{-1} \left[ O(n) \|\boldsymbol{\theta}_{\mathcal{A}}^* - \boldsymbol{\theta}_{\mathcal{A}}^0\|_2 + O(n) \|\boldsymbol{\theta}_{\mathcal{A}}^* - \boldsymbol{\theta}_{\mathcal{A}}^0\|_2^2 \right] \\ &= O(\lambda_1^{-1} \sqrt{s/n}) = o(1).\end{aligned}$$



With Conditions (C4), (C5) and (C8),

$$\begin{aligned}
(\lambda_1)^{-1} \|\lambda_2 \mathbf{J}_{(\tilde{\mathcal{A}}_2^k)^c, \mathcal{A}_2^k} \hat{\boldsymbol{\gamma}}_{k, \mathcal{A}_2^k}\|_\infty &= (\lambda_1)^{-1} \|\lambda_2 \mathbf{J}_{(\tilde{\mathcal{A}}_2^k)^c, \mathcal{A}_2^k} \boldsymbol{\gamma}_{k, \mathcal{A}_2^k}^0 - \lambda_2 \mathbf{J}_{(\tilde{\mathcal{A}}_2^k)^c, \mathcal{A}_2^k} (\hat{\boldsymbol{\gamma}}_{k, \mathcal{A}_2^k} - \boldsymbol{\gamma}_{k, \mathcal{A}_2^k}^0)\|_\infty \\
&\leq (\lambda_1)^{-1} \|\lambda_2 \mathbf{J}_{(\tilde{\mathcal{A}}_2^k)^c, \mathcal{A}_2^k} \boldsymbol{\gamma}_{k, \mathcal{A}_2^k}^0\|_\infty + (\lambda_1)^{-1} \|\lambda_2 \mathbf{J}_{(\tilde{\mathcal{A}}_2^k)^c, \mathcal{A}_2^k} (\hat{\boldsymbol{\gamma}}_{k, \mathcal{A}_2^k} - \boldsymbol{\gamma}_{k, \mathcal{A}_2^k}^0)\|_\infty \\
&= O(\lambda_1^{-1} \sqrt{s/n}) = o(1).
\end{aligned}$$

This completes the proof.

## 2 Web Appendix B

This section includes additional results for parameter selection, simulation, and data analysis.

### 2.1 Analysis of $c^{Pcorr}$ value for G factors with a network structure

To construct the adjacency matrix  $\mathbf{A}$  for gene expression data with a network structure, the cutoff  $c^{Pcorr}$  is calculated from the Fisher transformation following the literature (Huang et al., 2011). Specifically, with  $r_{jl}^{Pcorr}$ , the Fisher transformation is conducted as

$$u_{jl} = 0.5 \log \left( (1 + r_{jl}^{Pcorr}) / (1 - r_{jl}^{Pcorr}) \right).$$

If the correlation between gene expressions  $j$  and  $l$  is zero, then  $\sqrt{n-3}u_{jl}$  is approximately distributed as  $N(0, 1)$ . With this, a threshold  $c$  can be determined for  $\sqrt{n-3}u_{jl}$ , such as the 95th percentile. The corresponding threshold  $c^{Pcorr}$  for  $r_{jl}^{Pcorr}$  is then defined as  $c^{Pcorr} = (\exp(2c/\sqrt{n-3}) - 1) / (\exp(2c/\sqrt{n-3}) + 1)$ .

We conduct analysis on simulated data with a network structure to examine performance of the proposed approach with various values of  $c^{Pcorr}$ . Specifically, we set  $n = 350$ ,  $q = 5$  and  $p = 5,000$ . Thus, there are a total of 5,005 main effects and 25,000 interactions. The settings for E factors are the same as those in Section 3 (main text). Among the 5,000 G factors, there are 10 highly correlated clusters, each with size 5. G factors in different clusters are independent and generated from a multivariate Normal distribution with mean  $\mathbf{0}$  and covariance matrix AR(0.9) (we refer to Section 3 for details). The remaining 4,950 G factors are generated from a multivariate Normal distribution with mean  $\mathbf{0}$  and covariance matrix AR(0.3). There are 20 main G effects and 40 G-E interactions in the first four clusters with nonzero coefficients generated from Uniform(0.8,1.2). Both the network structure and the “main effects, interactions” hierarchical structure are satisfied. We consider a continuous response under the linear model with the random error following a standard Normal distribution. The evaluation measures are the same as those in Section 3, except

for the root structured error (RSE). As the true network structure can not be objectively measured, the estimated RSE is not available. The means and standard deviations (sd) of the evaluation measures as well as the means of average degree  $\frac{1}{p} \sum_{j=1}^p \sum_{l=1}^p |a_{jl}|$  over 500 replicates are provided in Web Table 1. It is observed that with a larger  $c^{Pcorr}$ , the adjacency matrix is sparser with a lower average degree. When  $c^{Pcorr} > 0.70$ , the adjacency matrix is almost an identity matrix, and the proposed approach simplifies to that without accommodating any structure. For sensible values in the range of  $[0.15, 0.25]$ , results are similar. The average values of  $c^{Pcorr}$  calculated from the Fisher transformation is 0.21, which leads to satisfactory results. It is noted that the sensible range and value of  $c^{Pcorr}$  calculated from the Fisher transformation are data-dependent.

Web Table 1: Simulation results for data with a network structure and various values of  $c^{Pcorr}$ . In each cell, mean (sd) based on 500 replicates.

| $c^{Pcorr}$ | M:TP      | M:FP        | I:TP       | I:FP      | EMSE        | PMSE         | Average degree   |
|-------------|-----------|-------------|------------|-----------|-------------|--------------|------------------|
| 0.05        | 18.9(1.5) | 0.1(0.0)    | 37.1(1.5)  | 29.9(3.0) | 5.54(0.42)  | 6.91(2.00)   | 136.0325(0.0512) |
| 0.07        | 19.0(1.5) | 0.1(0.0)    | 37.5(1.5)  | 29.9(3.0) | 5.48(0.41)  | 6.75(1.94)   | 74.7153(0.0544)  |
| 0.09        | 19.2(0.7) | 0.1(0.0)    | 37.8(1.5)  | 25.2(3.0) | 5.42(0.43)  | 6.61(1.99)   | 53.3912(0.0508)  |
| 0.11        | 19.8(0.0) | 0.0(0.0)    | 39.2(0.0)  | 22.0(3.0) | 5.15(0.36)  | 5.71(1.67)   | 19.8843(0.0295)  |
| 0.13        | 19.8(0.0) | 0.0(0.0)    | 39.2(0.0)  | 22.0(3.0) | 5.15(0.36)  | 5.71(1.67)   | 19.8843(0.0295)  |
| 0.15        | 19.9(0.0) | 0.0(0.0)    | 39.8(0.0)  | 16.7(3.0) | 4.88(0.29)  | 4.89(1.37)   | 10.5375(0.0236)  |
| 0.17        | 20.0(0.0) | 0.0(0.0)    | 40.0(0.0)  | 13.0(3.0) | 4.38(0.31)  | 3.75(1.02)   | 5.4117(0.0135)   |
| 0.19        | 20.0(0.0) | 0.0(0.0)    | 40.0(0.0)  | 10.9(4.4) | 3.54(0.22)  | 2.46(0.67)   | 2.8851(0.0137)   |
| 0.21        | 20.0(0.0) | 0.8(1.5)    | 40.0(0.0)  | 7.7(2.2)  | 3.07(0.38)  | 1.64(0.29)   | 1.7502(0.0083)   |
| 0.23        | 20.0(0.0) | 0.8(1.5)    | 40.0(0.0)  | 7.7(2.2)  | 3.07(0.38)  | 1.64(0.29)   | 1.7502(0.0083)   |
| 0.25        | 20.0(0.0) | 5.4(5.2)    | 38.5(1.5)  | 10.9(5.2) | 4.44(1.05)  | 2.81(0.52)   | 1.2859(0.0057)   |
| 0.27        | 20.0(0.0) | 10.4(3.7)   | 36.0(1.5)  | 11.4(4.4) | 6.12(2.28)  | 3.02(0.94)   | 1.1093(0.0029)   |
| 0.29        | 20.0(0.0) | 17.4(3.7)   | 36.0(1.5)  | 11.4(4.4) | 7.12(2.28)  | 6.02(0.94)   | 1.0493(0.0017)   |
| 0.31        | 20.0(0.0) | 19.2(3.7)   | 35.3(1.5)  | 11.2(3.0) | 7.20(2.55)  | 6.43(0.83)   | 1.0303(0.0012)   |
| 0.33        | 20.0(0.0) | 19.2(3.7)   | 35.3(1.5)  | 11.2(3.0) | 7.20(2.55)  | 6.43(0.83)   | 1.0245(0.0007)   |
| 0.35        | 20.0(0.0) | 20.6(5.9)   | 35.0(3.0)  | 10.2(5.9) | 7.67(2.27)  | 6.53(1.08)   | 1.0245(0.0007)   |
| 0.37        | 20.0(0.0) | 20.6(5.9)   | 35.0(3.0)  | 10.2(5.9) | 7.67(2.27)  | 6.53(1.08)   | 1.0228(0.0009)   |
| 0.39        | 19.9(0.0) | 21.3(3.7)   | 34.0(2.2)  | 9.9(4.4)  | 7.37(1.88)  | 6.68(0.94)   | 1.0220(0.0010)   |
| 0.41        | 20.0(0.0) | 21.3(1.5)   | 35.4(0.0)  | 10.1(2.2) | 6.95(0.16)  | 6.61(0.39)   | 1.0213(0.0011)   |
| 0.43        | 20.0(0.0) | 23.3(3.0)   | 35.0(0.0)  | 10.3(5.9) | 6.93(1.32)  | 7.92(0.50)   | 1.0207(0.0011)   |
| 0.45        | 20.0(0.0) | 23.3(3.7)   | 35.0(1.5)  | 11.0(5.2) | 7.66(2.28)  | 8.60(0.74)   | 1.0206(0.0011)   |
| 0.47        | 20.0(0.0) | 23.9(5.2)   | 34.8(1.5)  | 11.1(6.7) | 7.72(2.89)  | 7.81(1.33)   | 1.0198(0.0013)   |
| 0.49        | 20.0(0.0) | 25.9(4.4)   | 33.8(1.5)  | 10.3(3.7) | 7.83(1.77)  | 8.44(0.70)   | 1.0188(0.0013)   |
| 0.51        | 20.0(0.0) | 31.4(9.6)   | 33.5(3.7)  | 12.0(4.4) | 8.85(3.09)  | 9.11(1.18)   | 1.0175(0.0013)   |
| 0.53        | 19.4(0.0) | 33.0(6.7)   | 32.0(3.0)  | 11.6(3.7) | 8.67(2.16)  | 10.92(1.34)  | 1.0163(0.0015)   |
| 0.55        | 20.0(0.0) | 35.7(3.0)   | 33.7(0.0)  | 11.5(5.2) | 7.40(2.34)  | 11.51(0.82)  | 1.0154(0.0015)   |
| 0.57        | 20.0(0.0) | 37.8(8.2)   | 32.1(2.2)  | 11.7(4.4) | 9.28(2.37)  | 11.11(1.10)  | 1.0148(0.0013)   |
| 0.59        | 18.4(0.0) | 46.9(37.1)  | 27.6(11.1) | 13.2(9.6) | 11.38(6.99) | 17.43(5.92)  | 1.0134(0.0012)   |
| 0.61        | 20.0(0.0) | 50.2(14.1)  | 30.6(3.0)  | 13.3(3.7) | 10.76(3.99) | 14.77(1.89)  | 1.0121(0.0012)   |
| 0.63        | 18.1(3.0) | 61.9(66.7)  | 22.3(15.6) | 13.2(6.7) | 13.40(8.51) | 20.78(15.22) | 1.0104(0.0013)   |
| 0.65        | 18.1(3.0) | 61.9(66.7)  | 22.3(15.6) | 13.2(6.7) | 13.40(8.51) | 20.78(15.22) | 1.0104(0.0013)   |
| 0.67        | 17.1(1.5) | 75.3(49.7)  | 18.6(9.6)  | 14.4(4.4) | 15.41(4.78) | 24.67(18.40) | 1.0086(0.0013)   |
| 0.69        | 16.1(1.5) | 87.6(58.6)  | 15.7(5.2)  | 13.8(3.0) | 16.95(5.36) | 30.66(24.67) | 1.0065(0.0012)   |
| 0.71        | 14.1(1.5) | 89.8(33.4)  | 11.8(7.4)  | 15.1(6.7) | 18.51(4.81) | 31.63(22.03) | 1.0041(0.0013)   |
| 0.73        | 13.8(1.5) | 98.4(25.2)  | 10.1(5.2)  | 17.0(5.2) | 19.78(3.55) | 34.28(16.49) | 1.0022(0.0009)   |
| 0.75        | 14.1(1.5) | 101.5(26.7) | 9.8(3.7)   | 16.0(5.9) | 19.99(2.52) | 36.20(16.26) | 1.0022(0.0009)   |
| 0.77        | 14.1(1.5) | 101.5(26.7) | 9.8(3.7)   | 16.0(5.9) | 19.99(2.52) | 36.20(16.26) | 1.0011(0.0006)   |
| 0.79        | 13.0(1.5) | 102.2(33.4) | 9.6(3.7)   | 16.1(4.4) | 20.10(3.13) | 37.81(15.93) | 1.0004(0.0005)   |
| 0.81        | 13.0(1.5) | 105.7(43.7) | 9.3(4.4)   | 15.9(5.2) | 20.72(3.30) | 38.16(14.86) | 1.0001(0.0006)   |
| 0.83        | 13.0(1.5) | 105.7(43.7) | 9.3(4.4)   | 15.9(5.2) | 20.72(3.30) | 38.16(14.86) | 1.0000(0.0001)   |
| 0.85        | 12.9(1.5) | 105.2(47.4) | 9.4(4.4)   | 16.1(5.2) | 20.71(3.30) | 38.02(14.86) | 1.0000(0.0000)   |
| 0.87        | 12.9(1.5) | 105.2(47.4) | 9.4(4.4)   | 16.1(5.2) | 20.71(3.30) | 38.02(14.86) | 1.0000(0.0000)   |
| 0.89        | 12.9(1.5) | 105.2(47.4) | 9.4(4.4)   | 16.1(5.2) | 20.71(3.30) | 38.02(14.86) | 1.0000(0.0000)   |

## 2.2 Analysis of $r$ value in MCP

For  $r$ , published studies suggest setting it as fixed or examining a small number of values. Following the literature (Liu et al., 2013; Zhang, 2011), we examine four values of  $r$ , including 1.8, 3, 6, and 10, with simulation under the linear model. Scenarios with two auto-regressive (AR) correlation structures and two minor allele frequency (MAF) values have been considered. We refer to Section 3 (main text) for the detailed data generation, settings, and evaluation measures. Summary results are provided in Web Table 2. It is observed that compared to  $r = 1.8$  or 10, models with  $r = 3$  or 6 are less complex with fewer false positives and also fewer true positives. Overall, the proposed approach is not very sensitive to the choice of  $r$  when it is in a sensible range.

Web Table 2: Simulation results under the linear model with various values of  $r$  in MCP. In each cell, mean (sd) based on 500 replicates.

| $r$         | M:TP      | M:FP     | I:TP      | I:FP      | EMSE       | SMSE       | PMSE       |
|-------------|-----------|----------|-----------|-----------|------------|------------|------------|
| M1: AR(0.3) |           |          |           |           |            |            |            |
| 1.8         | 19.8(0.6) | 0.1(0.3) | 34.3(4.2) | 7.3(3.4)  | 3.08(0.33) | 2.76(0.20) | 1.92(0.35) |
| 3           | 19.2(1.0) | 0.0(0.0) | 32.6(2.9) | 6.6(2.9)  | 3.57(0.87) | 3.34(0.58) | 1.91(0.64) |
| 6           | 19.4(0.9) | 0.0(0.0) | 33.5(3.3) | 9.1(3.6)  | 3.60(0.93) | 3.22(0.56) | 1.80(0.44) |
| 10          | 19.7(0.6) | 0.1(0.4) | 35.3(2.3) | 13.0(3.4) | 3.53(0.87) | 3.23(0.45) | 1.79(0.45) |
| M1: AR(0.5) |           |          |           |           |            |            |            |
| 1.8         | 19.6(0.7) | 0.1(0.4) | 33.5(5.2) | 8.5(3.7)  | 3.36(0.41) | 2.93(0.26) | 2.07(0.29) |
| 3           | 19.2(0.8) | 0.0(0.2) | 33.6(2.5) | 5.1(3.1)  | 3.14(0.56) | 3.47(0.34) | 1.85(0.56) |
| 6           | 19.7(0.6) | 0.0(0.0) | 35.2(2.7) | 7.1(2.2)  | 3.19(0.85) | 3.33(0.39) | 1.76(0.44) |
| 10          | 19.8(0.4) | 0.1(0.3) | 36.5(2.0) | 11.5(3.4) | 3.12(0.81) | 3.35(0.33) | 1.72(0.39) |
| M2: AR(0.3) |           |          |           |           |            |            |            |
| 1.8         | 19.7(0.7) | 0.5(1.9) | 33.2(6.1) | 7.5(3.8)  | 3.11(0.33) | 2.75(0.20) | 1.91(0.39) |
| 3           | 19.1(1.2) | 0.0(0.0) | 32.2(3.6) | 5.9(2.5)  | 3.57(0.93) | 3.36(0.64) | 1.95(0.73) |
| 6           | 19.3(1.3) | 0.6(1.2) | 32.9(4.0) | 8.9(3.1)  | 3.78(0.98) | 3.29(0.64) | 1.92(0.84) |
| 10          | 19.3(1.5) | 2.6(4.1) | 34.1(3.4) | 11.3(4.2) | 3.71(0.92) | 3.42(0.47) | 2.08(0.98) |
| M2: AR(0.5) |           |          |           |           |            |            |            |
| 1.8         | 19.7(0.5) | 0.2(1.0) | 33.9(4.7) | 8.4(3.7)  | 3.12(0.40) | 2.89(0.23) | 2.01(0.32) |
| 3           | 19.1(0.9) | 0.0(0.2) | 33.6(2.6) | 5.4(3.4)  | 3.20(0.65) | 3.51(0.34) | 1.86(0.54) |
| 6           | 19.6(0.8) | 0.3(0.7) | 34.5(3.0) | 7.0(2.7)  | 3.33(0.82) | 3.42(0.42) | 1.83(0.43) |
| 10          | 19.4(0.9) | 1.8(2.1) | 35.4(2.7) | 9.8(3.2)  | 3.51(0.85) | 3.64(0.45) | 2.00(0.62) |

### 2.3 Detailed simulation settings

Two approaches, A1 and A2, are adopted to simulate G factors which mimic SNP data coded with three categories (0, 1, 2) for genotypes (aa, Aa, AA).

Approach A1 includes two steps, under which we first generate  $p$  continuous variables from a multivariate Normal distribution with mean  $\mathbf{0}$  and covariance matrix  $\Sigma = (\sigma_{jl})_{p \times p}$ , and then dichotomize the continuous variables at the  $q_1$  and  $q_2$  percentiles to generate 3-level G measurements (0, 1, 2). In the first step, two correlation structures are considered with different parameters. The first is the auto-regressive (AR) structure with  $\sigma_{jl} = \rho^{|j-l|}$ . We consider two levels of correlation with  $\rho = 0.3$  and  $0.5$  (referred to as AR(0.3) and AR(0.5)). The second is the banded correlation structure where two specific scenarios are considered. The first one (Band1) has  $\sigma_{jl} = 1$  if  $j = l$ ,  $0.3$  if  $|j - l| = 1$ , and  $0$  otherwise. The second one (Band2) has  $\sigma_{jl} = 1$  if  $j = l$ ,  $0.5$  if  $|j - l| = 1$ ,  $0.3$  if  $|j - l| = 2$ , and  $0$  otherwise. In the second step,  $q_1$  and  $q_2$  are adjusted to generate G factors with different minor allele frequency (MAF) values. Consider two specific scenarios. Under the first scenario (M1), all of the G factors have MAF=0.05 with  $q_1 = 0.91$  and  $q_2 = 0.99$ . Under the second one (M2), a half of the G factors have MAF=0.05, and the other half have MAF=0.15 with  $q_1 = 0.73$  and  $q_2 = 0.97$ .

Under A2, we simulate G factors with the pairwise LD structure. Specifically, denote  $p_A$  and  $p_B$  as the MAFs of alleles A and B for two adjacent SNPs. The LD is defined as  $\phi = r_{LD} \sqrt{p_A(1-p_A)p_B(1-p_B)}$  with pairwise correlation  $r_{LD}$ . Then, the four haplotypes ab, aB, Ab, AB have frequencies  $(1-p_A)(1-p_B) + \phi$ ,  $(1-p_A)p_B - \phi$ ,  $p_A(1-p_B) - \phi$ , and  $p_A p_B + \phi$ , respectively. With the Hardy-Weinberg equilibrium assumption, we simulate the SNP genotype (AA, Aa, aa) at locus 1 from a multinomial distribution given corresponding frequencies  $(p_A^2, 2p_A^2(1-p_A), (1-p_A)^2)$  and that at locus 2 accordingly from the conditional probability defined in Cui et al. (2008). Two pairwise correlations are considered with  $r_{LD} = 0.3$  and  $r_{LD} = 0.5$  (referred to as LD(0.3) and LD(0.5)). For MAF, two scenarios similar to those in Step 2 of A1 are considered.

The true coefficient values for the main G effects and interactions are set as follows:  $\beta_j = \sin(0.2j + 0.9) + 0.2$  for  $j = 1, \dots, 10$ ,  $\beta_j = 0.5(j - 10)$  for  $j = 11, \dots, 15$ ,  $\beta_j = 0.5(21 - j)$  for  $j = 16, \dots, 20$ ,  $\eta_{1j} = 0.2j + 0.2$  for  $j = 1, \dots, 5$ ,  $\eta_{1j} = 0.2(11 - j) + 0.2$  for  $j = 6, \dots, 11$ ,  $\eta_{2j} = 0.2\sqrt{3j - 32}$  for  $j = 11, \dots, 15$ ,  $\eta_{2j} = 0.2\sqrt{63 - 3j}$  for  $j = 16, \dots, 20$ ,  $\eta_{3j} = -(0.2j - 0.9)^2 + 1.5$  for  $j = 1, \dots, 10$ , and  $\eta_{3j} = -(0.2j - 3.2)^2 + 1.6$  for  $j = 11, \dots, 20$ . The rest of the effects are zero.



## 2.4 Simulation results under the AFT model

Web Table 3: Simulation results under the AFT model with MAF setting M1. In each cell, mean (sd) based on 500 replicates.

|          | M:TP      | M:FP       | I:TP      | I:FP        | RSSE          | RSE            | Cstat      |
|----------|-----------|------------|-----------|-------------|---------------|----------------|------------|
| AR(0.3)  |           |            |           |             |               |                |            |
| MA       | 0.8(1.7)  | 40.3(38.0) | 2.8(2.8)  | 95.5(77.6)  | 14.05(4.77)   | 26.37(19.93)   | 0.74(0.05) |
| HierMCP  | 13.5(1.9) | 38.3(6.3)  | 0.8(0.9)  | 0.5(0.8)    | 9.72(0.57)    | 15.84(1.81)    | 0.81(0.03) |
| SMCP     | 4.8(4.8)  | 6.5(13.7)  | 9.1(6.6)  | 31.9(15.7)  | 8.54(0.56)    | 3.24(0.80)     | 0.85(0.03) |
| Proposed | 19.2(1.2) | 1.2(6.7)   | 33.1(6.1) | 6.1(4.3)    | 2.99(1.09)    | 2.29(0.72)     | 0.93(0.02) |
| AR(0.5)  |           |            |           |             |               |                |            |
| MA       | 1.8(2.7)  | 55.8(38.9) | 4.7(4.0)  | 127.3(75.0) | 71.88(62.71)  | 173.12(166.62) | 0.56(0.10) |
| HierMCP  | 12.9(1.8) | 40.6(6.9)  | 0.9(1.0)  | 0.9(0.9)    | 10.13(0.69)   | 17.32(2.16)    | 0.80(0.03) |
| SMCP     | 6.5(4.9)  | 7.9(12.9)  | 8.9(7.2)  | 34.4(16.3)  | 8.36(0.72)    | 3.50(0.91)     | 0.85(0.03) |
| Proposed | 19.3(1.3) | 0.4(2.3)   | 34.2(4.9) | 5.4(4.0)    | 2.82(1.02)    | 2.18(0.58)     | 0.93(0.01) |
| Band1    |           |            |           |             |               |                |            |
| MA       | 1.1(1.9)  | 41.6(42.5) | 2.5(2.6)  | 92.7(80.5)  | 13.71(4.68)   | 25.49(20.59)   | 0.72(0.08) |
| HierMCP  | 13.5(1.7) | 37.1(5.7)  | 0.7(0.7)  | 0.4(0.8)    | 9.66(0.51)    | 15.60(1.67)    | 0.81(0.03) |
| SMCP     | 4.6(4.7)  | 5.1(12.0)  | 9.2(6.5)  | 28.5(15.6)  | 8.51(0.65)    | 3.20(0.92)     | 0.86(0.03) |
| Proposed | 19.3(1.2) | 0.4(1.4)   | 33.4(5.4) | 6.1(4.9)    | 2.92(0.90)    | 2.25(0.76)     | 0.93(0.01) |
| Band2    |           |            |           |             |               |                |            |
| MA       | 1.8(2.3)  | 59.6(41.1) | 5.5(3.9)  | 131.5(73.7) | 100.86(90.94) | 245.78(233.22) | 0.54(0.07) |
| HierMCP  | 12.8(1.9) | 42.0(8.2)  | 1.2(1.0)  | 0.6(0.8)    | 10.19(0.76)   | 17.70(2.15)    | 0.80(0.03) |
| SMCP     | 9.4(5.2)  | 17.8(18.5) | 9.3(6.5)  | 35.8(14.1)  | 8.10(0.83)    | 4.00(1.01)     | 0.85(0.03) |
| Proposed | 19.0(2.3) | 1.6(7.1)   | 33.2(7.5) | 5.5(4.9)    | 2.97(1.46)    | 2.24(0.90)     | 0.93(0.02) |
| LD(0.3)  |           |            |           |             |               |                |            |
| MA       | 1.5(2.6)  | 48.4(42.2) | 4.1(3.5)  | 103.0(78.6) | 17.58(8.62)   | 37.39(34.40)   | 0.70(0.09) |
| HierMCP  | 13.4(2.0) | 50.4(8.2)  | 0.6(0.9)  | 0.2(0.6)    | 10.58(0.81)   | 18.96(2.47)    | 0.80(0.03) |
| SMCP     | 4.4(4.5)  | 4.7(11.7)  | 11.7(8.1) | 21.3(11.2)  | 8.33(0.88)    | 2.98(0.67)     | 0.86(0.03) |
| Proposed | 19.2(1.6) | 0.3(1.5)   | 34.0(5.7) | 4.6(3.2)    | 2.79(1.04)    | 2.11(0.68)     | 0.93(0.01) |
| LD(0.5)  |           |            |           |             |               |                |            |
| MA       | 2.1(3.1)  | 57.5(39.7) | 7.3(4.9)  | 121.8(70.1) | 49.40(40.45)  | 125.38(118.24) | 0.58(0.10) |
| HierMCP  | 12.6(2.1) | 55.4(9.6)  | 0.8(0.8)  | 0.3(0.6)    | 11.18(0.90)   | 21.26(2.79)    | 0.78(0.07) |
| SMCP     | 6.8(5.7)  | 8.0(13.8)  | 13.8(8.6) | 22.7(12.9)  | 7.87(1.02)    | 3.16(1.04)     | 0.85(0.08) |
| Proposed | 19.4(1.1) | 0.2(1.8)   | 34.1(4.7) | 4.8(3.9)    | 2.78(0.89)    | 2.10(0.60)     | 0.93(0.02) |

Web Table 4: Simulation results under the AFT model with MAF setting M2. In each cell, mean (sd) based on 500 replicates.

|          | M:TP      | M:FP       | I:TP       | I:FP        | RSSE           | RSE            | Cstat      |
|----------|-----------|------------|------------|-------------|----------------|----------------|------------|
| AR(0.3)  |           |            |            |             |                |                |            |
| MA       | 2.1(2.7)  | 60.5(28.0) | 5.4(3.8)   | 157.2(67.9) | 145.73(130.23) | 360.20(327.86) | 0.55(0.04) |
| HierMCP  | 13.6(1.9) | 34.5(6.7)  | 1.2(1.1)   | 0.7(0.9)    | 9.56(0.60)     | 15.53(2.01)    | 0.82(0.03) |
| SMCP     | 5.8(4.8)  | 9.4(15.1)  | 4.1(2.7)   | 81.9(20.0)  | 8.68(0.37)     | 3.47(0.57)     | 0.82(0.05) |
| Proposed | 18.8(2.0) | 8.1(17.1)  | 30.1(9.9)  | 6.5(4.1)    | 3.52(1.74)     | 2.66(1.07)     | 0.92(0.03) |
| AR(0.5)  |           |            |            |             |                |                |            |
| MA       | 3.2(3.5)  | 68.6(21.8) | 7.8(4.9)   | 172.3(47.2) | 184.51(107.73) | 451.07(267.52) | 0.53(0.04) |
| HierMCP  | 12.8(1.8) | 37.9(7.4)  | 1.2(1.2)   | 0.9(0.9)    | 10.05(0.75)    | 17.06(2.41)    | 0.80(0.03) |
| SMCP     | 7.3(5.0)  | 12.4(18.1) | 3.8(3.3)   | 80.6(20.1)  | 8.56(0.53)     | 3.60(0.55)     | 0.82(0.03) |
| Proposed | 18.9(2.2) | 6.5(19.5)  | 31.9(9.4)  | 5.6(4.9)    | 3.22(1.80)     | 2.37(0.97)     | 0.92(0.03) |
| Band1    |           |            |            |             |                |                |            |
| MA       | 2.2(2.8)  | 61.6(33.5) | 5.1(3.8)   | 151.4(71.4) | 135.71(124.35) | 330.96(314.37) | 0.52(0.05) |
| HierMCP  | 13.8(1.7) | 33.5(6.0)  | 1.3(1.1)   | 0.7(0.7)    | 9.45(0.55)     | 15.20(1.91)    | 0.82(0.03) |
| SMCP     | 6.3(4.7)  | 8.0(13.0)  | 4.0(3.2)   | 79.8(19.9)  | 8.62(0.42)     | 3.40(0.51)     | 0.84(0.02) |
| Proposed | 18.9(1.7) | 14.8(28.5) | 28.3(11.3) | 6.3(4.6)    | 3.87(1.99)     | 2.82(1.22)     | 0.91(0.03) |
| Band2    |           |            |            |             |                |                |            |
| MA       | 3.8(3.6)  | 64.9(24.8) | 8.8(4.7)   | 167.1(51.5) | 207.33(179.97) | 519.71(455.48) | 0.53(0.04) |
| HierMCP  | 12.6(1.8) | 38.8(8.1)  | 1.6(1.3)   | 1.0(1.0)    | 10.11(0.75)    | 17.74(2.17)    | 0.80(0.03) |
| SMCP     | 8.0(4.5)  | 12.8(17.4) | 3.6(3.2)   | 79.5(21.2)  | 8.56(0.49)     | 3.71(0.62)     | 0.82(0.03) |
| Proposed | 18.5(2.8) | 11.3(24.1) | 29.4(11.5) | 5.5(4.0)    | 3.67(2.08)     | 2.65(1.26)     | 0.91(0.03) |
| LD(0.3)  |           |            |            |             |                |                |            |
| MA       | 2.7(3.6)  | 68.5(32.7) | 6.7(4.6)   | 163.2(69.2) | 144.42(131.19) | 357.04(335.25) | 0.50(0.07) |
| HierMCP  | 13.6(2.0) | 46.7(8.5)  | 1.1(1.2)   | 0.4(0.6)    | 10.39(0.85)    | 18.61(2.69)    | 0.81(0.03) |
| SMCP     | 5.8(4.5)  | 7.6(12.9)  | 6.6(4.5)   | 72.0(15.5)  | 8.46(0.67)     | 3.19(0.35)     | 0.84(0.04) |
| Proposed | 18.8(2.2) | 11.0(20.2) | 30.0(10.6) | 4.9(2.9)    | 3.53(1.91)     | 2.58(1.08)     | 0.92(0.02) |
| LD(0.5)  |           |            |            |             |                |                |            |
| MA       | 3.8(4.2)  | 66.5(23.0) | 10.5(5.8)  | 162.1(45.1) | 158.95(107.48) | 401.32(279.82) | 0.56(0.06) |
| HierMCP  | 12.4(2.1) | 52.4(9.8)  | 1.2(1.1)   | 0.5(0.7)    | 11.10(0.92)    | 21.15(2.92)    | 0.78(0.07) |
| SMCP     | 6.5(5.4)  | 7.8(15.9)  | 8.4(5.0)   | 67.7(18.4)  | 8.20(0.76)     | 3.07(0.66)     | 0.82(0.08) |
| Proposed | 18.9(1.8) | 8.1(18.9)  | 31.0(8.9)  | 4.9(3.9)    | 3.33(1.59)     | 2.40(0.98)     | 0.92(0.03) |

## 2.5 Simulation results under the linear model with highly correlated predictors

For the linear model with MAF setting M1, we simulate three additional scenarios with highly correlated predictors. Specifically, the first and second scenarios are based on approach A1. The first (AR(0.9)) has an AR correlation structure with  $\rho = 0.9$ . The second (Band3) has  $\sigma_{jl} = 1$  if  $j = l$ , 0.7 if  $|j - l| = 1$ , 0.4 if  $|j - l| = 2$ , 0.2 if  $|j - l| = 3$ , and 0 otherwise. The third scenario (LD(0.9)) is based on approach A2 with the pairwise correlation  $r_{LD} = 0.9$ . Summary results are provided in Web Table 5.

Web Table 5: Simulation results under the linear model with MAF setting M1 and highly correlated predictors. In each cell, mean (sd) based on 500 replicates.

|          | M:TP      | M:FP        | I:TP      | I:FP        | EMSE         | SMSE           | PMSE         |
|----------|-----------|-------------|-----------|-------------|--------------|----------------|--------------|
| AR(0.9)  |           |             |           |             |              |                |              |
| MA       | 4.8(5.0)  | 33.3(21.4)  | 20.0(5.2) | 169.0(36.7) | 69.96(11.00) | 167.22(123.35) | 89.07(44.88) |
| HierMCP  | 10.9(1.8) | 64.3(86.3)  | 11.0(4.4) | 41.6(13.6)  | 21.91(4.77)  | 52.49(10.10)   | 34.18(33.73) |
| SMCP     | 12.8(3.2) | 0.0(0.0)    | 31.1(3.6) | 67.0(16.7)  | 6.39(1.59)   | 3.32(0.28)     | 3.41(1.58)   |
| Proposed | 19.3(0.8) | 0.1(0.3)    | 34.3(2.5) | 5.5(3.9)    | 3.27(0.67)   | 3.66(0.50)     | 2.03(0.67)   |
| Band3    |           |             |           |             |              |                |              |
| MA       | 0.7(1.9)  | 15.8(14.4)  | 5.2(4.2)  | 127.3(77.9) | 27.16(13.65) | 63.85(39.38)   | 65.07(31.68) |
| HierMCP  | 15.3(1.9) | 211.7(71.7) | 6.2(3.7)  | 23.8(10.8)  | 16.70(2.05)  | 34.76(4.55)    | 35.78(9.47)  |
| SMCP     | 8.4(5.6)  | 0.0(0.0)    | 31.6(5.7) | 69.5(20.6)  | 5.85(1.70)   | 3.21(0.33)     | 3.21(2.57)   |
| Proposed | 19.8(0.5) | 0.0(0.2)    | 36.6(1.6) | 5.8(2.9)    | 2.68(0.46)   | 3.16(0.35)     | 1.63(0.33)   |
| LD(0.9)  |           |             |           |             |              |                |              |
| MA       | 0.0(0.2)  | 8.2(11.4)   | 10.3(6.1) | 88.8(84.3)  | 60.01(46.61) | 175.64(152.29) | 85.87(50.86) |
| HierMCP  | 8.9(1.7)  | 90.5(100.4) | 8.8(4.1)  | 28.0(12.1)  | 19.95(3.97)  | 47.84(7.93)    | 26.69(23.07) |
| SMCP     | 10.9(5.4) | 0.0(0.0)    | 32.9(3.0) | 54.3(16.1)  | 5.39(1.36)   | 3.29(0.20)     | 2.21(0.55)   |
| Proposed | 18.4(1.1) | 0.0(0.0)    | 31.9(2.7) | 2.6(2.8)    | 4.05(0.73)   | 4.32(0.42)     | 1.82(0.47)   |

## 2.6 Estimation results for data analysis with the proposed approach

Web Table 6: Analysis of the GENEVA diabetes data (NHS/HPFS) using the proposed approach: identified main effects and interactions.

| SNP        | Location | Gene*         |         | age     | famdb   | act     | trans  | ceraf   | heme    |
|------------|----------|---------------|---------|---------|---------|---------|--------|---------|---------|
|            |          |               |         | -0.3331 | 0.1711  | -0.2659 | 0.2185 | -0.3332 | 0.5615  |
| rs17090278 | 61679934 | RP11-593F5.2  | -0.0016 |         |         |         |        |         |         |
| rs10019557 | 61684734 | RP11-593F5.2  | -0.0019 |         |         |         |        |         |         |
| rs17090285 | 61695580 | RP11-593F5.2  | -0.0019 |         |         |         |        |         |         |
| rs17090286 | 61695978 | RP11-593F5.2  | -0.0016 |         |         |         |        |         |         |
| rs11731112 | 65554491 | RP11-63H19.1  | 0.0015  |         |         |         |        |         |         |
| rs4355422  | 65557183 | RP11-63H19.1  | 0.0015  |         |         |         |        |         |         |
| rs1430504  | 65681190 | RP11-707A18.1 | -0.0035 |         |         |         |        |         |         |
| rs6551878  | 65690589 | RP11-707A18.1 | -0.0056 |         |         |         |        |         |         |
| rs6823601  | 65691562 | RP11-707A18.1 | -0.0043 |         |         |         |        |         |         |
| rs13151560 | 67160442 | MIR1269A      | 0.0025  |         |         |         |        |         |         |
| rs1858306  | 67161812 | MIR1269A      | 0.0083  | 0.0021  | 0.002   | -0.0013 | 0.0027 |         |         |
| rs10016795 | 67167064 | MIR1269A      | 0.0174  | 0.0047  | 0.0074  | -0.0054 | 0.0096 | -0.0026 | -0.0034 |
| rs17087008 | 67188696 | MIR1269A      | 0.0282  | 0.0049  | 0.0169  | -0.0145 | 0.0213 | -0.0046 | -0.0119 |
| rs12331987 | 67188980 | MIR1269A      | 0.0373  |         | 0.0261  | -0.0265 | 0.0308 | -0.0056 | -0.0256 |
| rs10000219 | 67200024 | MIR1269A      | 0.0405  | -0.0105 | 0.0274  | -0.0336 | 0.0304 | -0.0028 | -0.0357 |
| rs4860208  | 67201368 | MIR1269A      | 0.035   | -0.0142 | 0.02    | -0.0277 | 0.0197 |         | -0.0301 |
| rs1511286  | 67213473 | MIR1269A      | 0.0215  | -0.0077 | 0.0082  | -0.0126 | 0.0072 |         | -0.0139 |
| rs1033095  | 67232011 | RPS23P3       | 0.0064  | -0.0012 | 0.0011  | -0.0019 |        |         | -0.002  |
| rs11936928 | 67489994 | RPS23P3       | 0.0014  |         |         |         |        |         |         |
| rs6838523  | 67494918 | RPS23P3       | 0.0014  |         |         |         |        |         |         |
| rs10033058 | 69177408 | YTHDC1        | 0.0055  |         |         |         |        |         |         |
| rs2293595  | 69178920 | YTHDC1        | 0.0097  |         |         |         |        |         | 0.0031  |
| rs12649108 | 69181942 | YTHDC1        | 0.0095  |         |         |         |        |         | 0.0036  |
| rs17089267 | 69183791 | YTHDC1        | 0.0067  |         |         |         |        |         | 0.002   |
| rs1730872  | 69189048 | YTHDC1        | 0.0018  |         |         |         |        |         |         |
| rs1399247  | 70973970 | CSN1S2AP      | -0.0012 |         |         |         |        |         |         |
| rs1717600  | 70974315 | CSN1S2AP      | -0.0013 |         |         |         |        |         |         |
| rs11936367 | 72884978 | NPFFR2        | -0.0013 |         |         |         |        |         |         |
| rs7699403  | 72893324 | NPFFR2        | -0.0042 |         |         |         |        |         |         |
| rs6856651  | 72896457 | NPFFR2        | -0.0068 | 0.0013  |         |         |        |         | -0.001  |
| rs7654531  | 72900621 | NPFFR2        | -0.0079 | 0.0018  |         |         |        |         | -0.0013 |
| rs6824342  | 72903182 | NPFFR2        | -0.0074 | 0.0016  |         |         |        |         |         |
| rs6824703  | 72903318 | NPFFR2        | -0.0051 |         |         |         |        |         |         |
| rs7687603  | 72915996 | NPFFR2        | -0.002  |         |         |         |        |         |         |
| rs12649753 | 74940765 | CXCL2         | 0.0092  |         |         | -0.0023 |        |         | 0.0026  |
| rs546829   | 74956372 | CXCL2         | 0.0199  | -0.0012 | -0.0028 | -0.012  | 0.0024 | 0.0027  | 0.0129  |
| rs1837559  | 74959093 | CXCL2         | 0.0257  | -0.003  | -0.0061 | -0.0217 | 0.0033 | 0.0034  | 0.0226  |

Web Table 6: Continued from the previous page

| SNP        | Position  | Gene         |         | age     | famdb   | act     | trans   | ceraf  | heme    |
|------------|-----------|--------------|---------|---------|---------|---------|---------|--------|---------|
| rs9131     | 74963049  | CXCL2        | 0.0232  | -0.0038 | -0.0066 | -0.0196 | 0.0021  | 0.0011 | 0.0199  |
| rs1866755  | 74978340  | MTHFD2L      | 0.0156  | -0.0024 | -0.0038 | -0.0098 |         |        | 0.0096  |
| rs7686861  | 74998484  | MTHFD2L      | 0.0064  |         |         | -0.0019 |         |        | 0.0018  |
| rs11737437 | 80262521  | NAA11        | -0.0019 |         |         |         |         |        |         |
| rs10004440 | 80272792  | NAA11        | -0.0043 |         |         |         |         |        |         |
| rs2903619  | 80281513  | NAA11        | -0.0056 |         |         |         |         |        |         |
| rs11731223 | 80290084  | GK2          | -0.0051 |         |         |         |         |        |         |
| rs6534350  | 80305179  | GK2          | -0.0025 |         |         |         |         |        |         |
| rs17003746 | 80314643  | GK2          | -0.0015 |         |         |         |         |        |         |
| rs11930550 | 80317724  | GK2          | -0.0019 |         |         |         |         |        |         |
| rs17003749 | 80317772  | GK2          | -0.0014 |         |         |         |         |        |         |
| rs7680648  | 82666782  | RP11-689K5.3 | -0.0018 |         |         |         |         |        |         |
| rs17561568 | 82667783  | RP11-689K5.3 | -0.0068 | -0.0011 |         |         |         |        |         |
| rs35036928 | 82671170  | RP11-689K5.3 | -0.0137 | -0.0036 |         | -0.0026 |         |        | -0.0032 |
| rs4693369  | 82671234  | RP11-689K5.3 | -0.0156 | -0.0046 |         | -0.0027 |         |        | -0.0049 |
| rs12508164 | 82671299  | RP11-689K5.3 | -0.012  | -0.0029 |         | -0.001  |         |        | -0.0038 |
| rs7672440  | 82671938  | RP11-689K5.3 | -0.0079 | -0.0013 |         |         |         |        | -0.0018 |
| rs1353661  | 82672523  | RP11-689K5.3 | -0.0025 |         |         |         |         |        |         |
| rs676592   | 82733530  | RP11-689K5.3 | -0.0012 |         |         |         |         |        |         |
| rs1993798  | 82762741  | RP11-689K5.3 | 0.0047  |         |         |         |         |        |         |
| rs2868257  | 82762839  | RP11-689K5.3 | 0.0072  |         |         |         |         |        |         |
| rs6535281  | 82763010  | RP11-689K5.3 | 0.0048  |         |         |         |         |        |         |
| rs6535291  | 82926694  | RP11-689K5.3 | -0.0011 |         |         |         |         |        |         |
| rs434193   | 86253489  | ARHGAP24     | -0.0032 |         |         |         |         |        |         |
| rs6842681  | 86253994  | ARHGAP24     | -0.0084 | 0.0019  |         | -0.0036 | -0.0033 |        | -0.0031 |
| rs425196   | 86255297  | ARHGAP24     | -0.0144 | 0.0054  |         | -0.0083 | -0.0073 |        | -0.0076 |
| rs416035   | 86255366  | ARHGAP24     | -0.0203 | 0.0111  | -0.0014 | -0.014  | -0.0117 |        | -0.0136 |
| rs432755   | 86255399  | ARHGAP24     | -0.0252 | 0.0174  | -0.003  | -0.0196 | -0.016  |        | -0.0196 |
| rs375432   | 86255845  | ARHGAP24     | -0.0276 | 0.0214  | -0.0041 | -0.0224 | -0.0185 |        | -0.023  |
| rs425642   | 86255997  | ARHGAP24     | -0.0257 | 0.0207  | -0.0037 | -0.0194 | -0.016  |        | -0.021  |
| rs407430   | 86256356  | ARHGAP24     | -0.0204 | 0.0151  | -0.0023 | -0.0128 | -0.0109 |        | -0.0148 |
| rs400023   | 86256538  | ARHGAP24     | -0.0131 | 0.0077  |         | -0.0062 | -0.0056 |        | -0.0077 |
| rs585787   | 86257453  | ARHGAP24     | -0.006  | 0.0023  |         | -0.0019 | -0.0019 |        | -0.0025 |
| rs380632   | 86264123  | ARHGAP24     | -0.0012 |         |         |         |         |        |         |
| rs2726516  | 106346206 | PPA2         | 0.0022  |         |         |         |         |        |         |
| rs2636739  | 106352105 | PPA2         | 0.0022  |         |         |         |         |        |         |

\* Genes that SNPs belong to or are the closest to.

Web Table 7: Analysis of the TCGA SKCM data using the proposed approach: identified main effects and interactions

| Gene      |         | Age     | PN      | Gender  | Breslow's depth | Clark level |
|-----------|---------|---------|---------|---------|-----------------|-------------|
|           |         | -0.1381 | -0.3077 | 0.0536  | -0.2158         | -0.1590     |
| ACTL6B    | -0.0067 |         |         |         |                 |             |
| BLOC1S5   | 0.0188  | -0.0012 |         |         |                 |             |
| C3ORF67   | 0.0420  | -0.0014 | 0.0064  |         | 0.0169          | 0.0016      |
| CLEC2L    | -0.0069 |         |         |         |                 |             |
| CLPB      | -0.0048 |         |         |         |                 |             |
| CREG1     | 0.0281  |         |         | -0.0018 |                 |             |
| CRYBA1    | -0.0037 |         |         |         |                 |             |
| ENDOD1    | 0.0160  |         | -0.0013 | -0.0014 |                 | -0.0020     |
| ETV3      | -0.0019 |         |         |         |                 |             |
| FAM131B   | 0.0041  |         |         |         |                 |             |
| GOLPH3L   | -0.0024 |         |         |         |                 |             |
| IFNA7     | -0.0018 |         |         |         |                 |             |
| IL17A     | 0.0046  |         |         |         |                 |             |
| IL17F     | 0.0143  |         |         | -0.0014 |                 |             |
| IL34      | 0.0030  |         |         |         |                 |             |
| INPP5K    | 0.0093  |         |         |         |                 |             |
| INTS4     | -0.0055 |         |         |         |                 |             |
| ISL2      | -0.0022 |         |         |         |                 |             |
| KCNE1     | 0.0281  | -0.0026 |         | 0.0024  |                 | -0.0055     |
| LAMTOR1   | -0.0078 |         |         |         |                 |             |
| LANCL2    | 0.0149  |         |         |         |                 | 0.0012      |
| LYNX1     | -0.0261 | 0.0012  | 0.0021  | -0.0011 |                 | -0.0026     |
| MEPE      | 0.0144  | -0.0012 |         |         |                 | -0.0014     |
| METTL21C  | 0.0087  |         |         |         |                 |             |
| NKAIN2    | -0.0239 | 0.0019  | 0.0027  |         | 0.0013          | 0.0033      |
| NKAIN3    | -0.0019 |         |         |         |                 |             |
| NOV       | 0.0422  |         | -0.0070 | -0.0085 | -0.0060         | 0.0047      |
| OR5L2     | 0.0452  | -0.0103 | -0.0064 | -0.0103 | -0.0037         | 0.0053      |
| PRSS3     | -0.0100 |         |         |         |                 |             |
| PXDNL     | -0.0106 |         |         |         |                 |             |
| RAC1      | -0.0177 |         |         |         |                 | 0.0013      |
| RAET1L    | 0.0093  |         |         |         |                 |             |
| RIMS2     | 0.0076  |         |         |         |                 |             |
| RPTN      | -0.0023 |         |         |         |                 |             |
| SERPINB13 | -0.0079 |         |         |         |                 |             |
| SERPINB3  | -0.0018 |         |         |         |                 |             |

Continued on the next page

Web Table 7: Continued from the previous page

| Gene   | Age     | PN      | Gender  | Breslow's depth | Clark level |         |
|--------|---------|---------|---------|-----------------|-------------|---------|
| SETD3  | 0.0139  |         |         |                 |             |         |
| SKIDA1 | -0.0075 |         |         |                 |             |         |
| SLFN13 | 0.0212  | -0.0023 | -0.0023 |                 |             |         |
| SPINK4 | 0.0012  |         |         |                 |             |         |
| SPRR2B | 0.0015  |         |         |                 |             |         |
| STMN4  | 0.0035  |         |         |                 |             |         |
| STPG4  | -0.0055 |         |         |                 |             |         |
| SYT12  | 0.0027  |         |         |                 |             |         |
| TAS2R1 | -0.0056 |         |         |                 |             |         |
| TRIM46 | -0.0117 |         |         |                 |             |         |
| UBE2V1 | -0.0317 | -0.0018 | 0.0045  |                 | 0.0019      |         |
| UGT1A7 | -0.0056 |         |         |                 |             |         |
| WDPCP  | -0.0843 | -0.0194 | -0.0322 | -0.0018         | 0.0206      | -0.0192 |
| WDR77  | -0.0137 |         |         |                 |             |         |

## **2.7 Implications of the markers identified with the proposed approach**

### **2.7.1 GENEVA diabetes data (NHS/HPFS)**

Gene NPPFR2 has been found to play an important role in obesity predisposition, and some NPPFR2 haplotypes have been suggested to be strongly protective against obesity (Hunt et al., 2011). Gene CXCL2 has been shown to be up-regulated in obese subjects and contribute to the chemotaxis of neutrophils which are one type of circulating cells greatly activated in obese subjects (Rouault et al., 2013). Published analysis has also found that the enzyme encoded by gene GK2 plays a key role in the regulation of glycerol uptake and metabolism (Song et al., 2011), and its activity in human adipose tissue is related to obesity (Chakrabarty et al., 1984).

### **2.7.2 TCGA skin cutaneous melanoma data**

ACTL6A (BAF53) is a subunit of the SWI/SNF complex which has been found to be critical for the expression of microphthalmia-associated transcription factor in melanoma cells (Vachtenheim et al., 2010). FAM131B-BRAF fusion has been observed to comprise an alternative mechanism of MAPK pathway activation (Cin et al., 2011), and MAPK pathway plays important roles in melanoma etiology, prognosis, and treatment (Fecher et al., 2008). Gene GOLPH3 has been shown to regulate cell size and enhance growth-factor-induced mTOR signaling in melanoma cells (Liu et al., 2018), and suggested as a new oncogene that is commonly targeted for amplification in melanoma (Scott et al., 2009). Gene IL17A has been found to have tumorigenic effects in melanoma cell lines, which are related to the signal transducer and activator of transcription pathway signaling (Wang et al., 2009). It has been demonstrated that mutations in RAC1 are potentially biologically associated with cutaneous melanoma, and the pharmacological inhibition of downstream effectors of RAC1 signaling can be of therapeutic benefit (Krauthammer et al., 2012). In addition, gene SERPINB3 has been reported to be up-regulated in benign hyperplasia in melanoma (Jung et al., 2011).



## 2.8 Biological similarity analysis based on Gene Ontology

To gain deeper insight into differences of the markers identified by different approaches, we conduct a closer examination of the Gene Ontology (GO) biological processes. For GENEVA data, the proposed approach together with three alternatives identify a total of 110 unique genes (that the identified SNPs belong to or are the closest to). These genes represent a total of 51 GO biological processes, of which the p-values computed from the GO enrichment analysis are smaller than 0.05. Here the GO enrichment analysis is realized using the R package *GOSim*. It is observed that the majority of these processes are related to “regulation”. We further separate the 51 processes into four categories: positive regulation (P), negative regulation (N), regulation (R, without a well-defined “direction”), and other (O). In Web Figure 3, we provide the proportions of genes that have the four categories of processes with different approaches. It is observed that the four approaches have different distributions with a moderate level of similarity. Similar analysis is conducted on the TCGA SKCM data, where a total of 238 unique genes are identified. These genes represent a total of 124 GO biological processes, which are also separated into four categories. The proportions of genes that have the four categories of processes with different approaches are provided in Web Figure 3. The three joint analysis approaches, HierMCP, SMCP, and the proposed one, have a higher level of similarity compared to MA. These three approaches have slightly different proportions of positive regulation, negative regulation, and regulation.

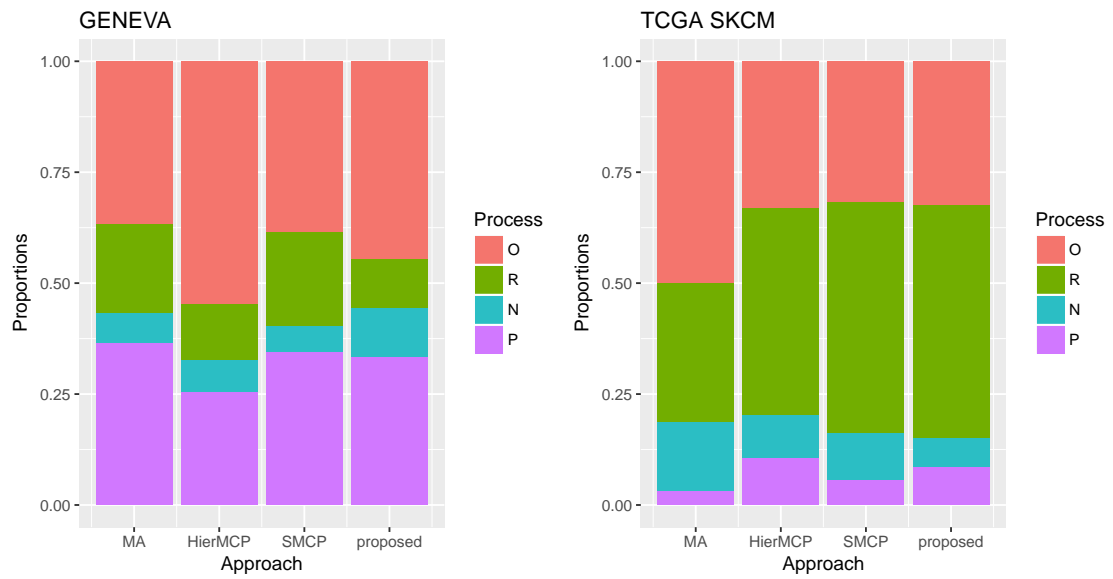

Web Figure 3: Data analysis: proportions of genes that have the four categories of processes with different approaches. Left: GENEVA data. Right: TCGA SKCM data.

## 2.9 Estimation results for data analysis with the three alternatives

Web Table 8: Analysis of the GENEVA diabetes data (NHS/HPFS) using MA: identified main effects and interactions.

| SNP        | Location | Gene          | age     | famdb  | act     | trans   | ceraf   | heme    |
|------------|----------|---------------|---------|--------|---------|---------|---------|---------|
|            |          |               | 0.18    | 0.1547 | -0.3866 | 0.0691  | -0.6648 | 0.5573  |
| rs10021002 | 61129136 | AC095061.1    | -0.2414 |        |         |         |         |         |
| rs10019682 | 61228770 | AC095061.1    | 0.1505  |        |         |         |         |         |
| rs11946495 | 61238161 | AC095061.1    | 0.4238  |        |         |         |         |         |
| rs4318680  | 61249881 | AC095061.1    | -0.5856 |        |         |         |         |         |
| rs1511104  | 61287186 | AC095061.1    | 0.0450  |        |         |         |         |         |
| rs1546511  | 61327179 | AC095061.1    | -0.4675 |        |         |         |         |         |
| rs10021608 | 61352529 | AC095061.1    | 0.0969  |        |         |         |         |         |
| rs17090278 | 61679934 | RP11-593F5.2  | 0.2229  |        |         |         |         |         |
| rs17090286 | 61695978 | RP11-593F5.2  | -0.6965 |        |         |         |         |         |
| rs13122165 | 61762061 | RP11-593F5.2  | 0.0407  |        |         |         |         |         |
| rs17828144 | 61803167 | RP11-593F5.2  | 0.0200  |        |         |         |         |         |
| rs17239101 | 62495735 | LPHN3         |         |        |         |         |         | 0.3395  |
| rs7671984  | 63243647 | RP11-30P21.2  |         |        |         |         | 0.1845  |         |
| rs1430504  | 65681190 | RP11-707A18.1 | -0.2050 |        |         |         |         |         |
| rs6551878  | 65690589 | RP11-707A18.1 | -0.1019 |        |         |         |         |         |
| rs13435819 | 65736743 | RP11-707A18.1 |         |        |         |         |         | -0.0715 |
| rs10002424 | 65744523 | RP11-707A18.1 |         |        |         |         |         | 0.1317  |
| rs10028673 | 65748015 | RP11-707A18.1 |         |        |         |         |         | -0.1254 |
| rs13139468 | 65763976 | RP11-707A18.1 |         |        |         |         |         | 0.1179  |
| rs10005825 | 65778213 | RP11-707A18.1 |         |        |         |         |         | -0.4144 |
| rs7667410  | 66486986 | EPHA5         |         |        |         | 1.3617  |         |         |
| rs7659227  | 66496170 | EPHA5         |         |        |         | -1.2760 |         |         |
| rs4370201  | 66500571 | EPHA5         |         |        |         | 0.2358  |         |         |
| rs13107026 | 67139034 | MIR1269A      | -0.3099 |        |         |         |         |         |
| rs1397755  | 67140834 | MIR1269A      | 0.6150  |        |         |         |         |         |
| rs13151560 | 67160442 | MIR1269A      | 0.2824  |        |         |         |         |         |
| rs1858306  | 67161812 | MIR1269A      | -0.5931 |        |         |         |         |         |
| rs12331987 | 67188980 | MIR1269A      | 0.2053  |        |         |         |         |         |
| rs10000219 | 67200024 | MIR1269A      | -0.3886 |        |         |         |         |         |
| rs4860208  | 67201368 | MIR1269A      | 0.2988  |        |         |         |         |         |
| rs1511286  | 67213473 | MIR1269A      | 0.2312  |        |         |         |         |         |
| rs2136822  | 67482764 | RPS23P3       | 0.1948  |        |         |         |         |         |
| rs11936928 | 67489994 | RPS23P3       | 0.0932  |        |         |         |         |         |
| rs6838523  | 67494918 | RPS23P3       | 0.0932  |        |         |         |         |         |

Continued on the next page

Web Table 8: Continued from the previous page

| SNP        | Position | Gene          | age     | famdb   | act     | trans  | ceraf  | heme    |
|------------|----------|---------------|---------|---------|---------|--------|--------|---------|
| rs17088752 | 68747036 | UBA6-AS1      | 0.6826  |         |         |        |        |         |
| rs2293595  | 69178920 | YTHDC1        | 0.5827  |         |         |        |        |         |
| rs17089267 | 69183791 | YTHDC1        | -0.2146 |         |         |        |        |         |
| rs11249477 | 70934425 | CSN1S2AP      | -0.2276 |         |         |        |        |         |
| rs1399247  | 70973970 | CSN1S2AP      | 0.1586  |         |         |        |        |         |
| rs1717600  | 70974315 | CSN1S2AP      | -0.3458 |         |         |        |        |         |
| rs1842478  | 71227802 | SMR3A         |         |         |         |        |        | -0.3286 |
| rs10003790 | 71957713 | DCK           | 0.5628  |         |         |        |        |         |
| rs12649753 | 74940765 | RP11-629B11.4 | 0.2633  |         |         |        |        |         |
| rs13148163 | 77504400 | SHROOM3       |         |         |         |        |        | -0.2491 |
| rs7810     | 77968346 | CCNI          |         |         |         | 0.5323 |        |         |
| rs4272042  | 78053975 | RNU6-1187P    |         | 0.4129  |         |        |        |         |
| rs2903455  | 79095407 | FRAS1         |         |         |         |        |        | 1.0048  |
| rs17003019 | 79095443 | FRAS1         |         |         |         |        |        | -1.3661 |
| rs143371   | 79257710 | FRAS1         |         |         | -0.4509 |        |        |         |
| rs7681755  | 80184659 | LINC01088     | -0.4519 |         |         |        |        |         |
| rs11731223 | 80290084 | GK2           | -0.1388 |         |         |        |        |         |
| rs17003746 | 80314643 | GK2           | -0.1966 |         |         |        |        |         |
| rs11937407 | 81413618 | C4orf22       |         | -2.7727 |         |        |        |         |
| rs6858262  | 81441388 | C4orf22       |         | 0.2385  |         |        |        |         |
| rs17004924 | 81445307 | C4orf22       |         | -2.7994 |         |        |        |         |
| rs1843563  | 81454827 | C4orf22       |         | 4.931   |         |        |        |         |
| rs10004901 | 81897005 | C4orf22       | -0.441  |         |         |        |        |         |
| rs733241   | 82116677 | RP11-100N20.1 |         |         |         |        | 0.2034 |         |
| rs1391262  | 82663506 | RP11-689K5.3  | -0.0371 |         |         |        |        |         |
| rs35036928 | 82671170 | RP11-689K5.3  | -0.9472 |         |         |        |        |         |
| rs4693369  | 82671234 | RP11-689K5.3  | 0.8823  |         |         |        |        |         |
| rs7672440  | 82671938 | RP11-689K5.3  | -0.0615 |         |         |        |        |         |
| rs676592   | 82733530 | RP11-689K5.3  | -0.1434 |         |         |        |        |         |
| rs1993798  | 82762741 | RP11-689K5.3  | 1.6689  |         |         |        |        |         |
| rs2868257  | 82762839 | RP11-689K5.3  | 0.2131  |         |         |        |        |         |
| rs6535281  | 82763010 | RP11-689K5.3  | -0.461  |         |         |        |        |         |
| rs612318   | 82764165 | RP11-689K5.3  | -0.2764 |         |         |        |        |         |
| rs1824657  | 82783136 | RP11-689K5.3  | -1.4809 |         |         |        |        |         |

Continued on the next page

Web Table 8: Continued from the previous page

| SNP        | Position  | Gene          | age     | famdb  | act     | trans   | ceraf   | heme    |
|------------|-----------|---------------|---------|--------|---------|---------|---------|---------|
| rs11722328 | 82818968  | RP11-689K5.3  | 0.5812  |        |         |         |         |         |
| rs2199487  | 82820008  | RP11-689K5.3  | -0.3459 |        |         |         |         |         |
| rs7436836  | 84288014  | HPSE          |         |        |         |         |         | 0.2181  |
| rs392112   | 86244117  | RP11-218C23.1 | -2.8736 |        |         |         |         |         |
| rs434193   | 86253489  | RP11-218C23.1 | -0.8468 |        |         |         |         |         |
| rs416035   | 86255366  | RP11-218C23.1 | -4.5803 |        |         |         |         |         |
| rs432755   | 86255399  | RP11-218C23.1 | 2.7866  |        |         |         |         |         |
| rs375432   | 86255845  | RP11-218C23.1 | -0.2408 |        |         |         |         |         |
| rs407430   | 86256356  | RP11-218C23.1 | 8.9916  |        |         |         |         |         |
| rs400023   | 86256538  | RP11-218C23.1 | -3.514  |        |         |         |         |         |
| rs7656367  | 89196821  | PPM1K         |         |        |         |         |         | 0.2831  |
| rs3775373  | 89743821  | FAM13A        | -0.3285 |        |         |         |         |         |
| rs10031177 | 91941942  | CCSER1        |         |        |         | -0.7535 |         |         |
| rs1898905  | 94650978  | GRID2         |         | 0.1739 |         |         |         |         |
| rs17021080 | 94674019  | GRID2         |         | 0.2608 |         |         |         |         |
| rs10022681 | 97114273  | RNU6-34P      |         |        |         |         | -0.3874 |         |
| rs6532594  | 97114706  | RNU6-34P      |         |        |         |         | 0.1882  |         |
| rs1395199  | 97177286  | RP11-145G20.1 |         |        |         |         | -0.5635 |         |
| rs6817234  | 97205150  | RP11-145G20.1 |         |        |         |         | 0.5911  |         |
| rs6817554  | 97293102  | RP11-145G20.1 |         |        |         |         | 0.8506  |         |
| rs6840466  | 97311763  | RP11-145G20.1 |         |        |         |         | -0.3888 |         |
| rs9307172  | 97395506  | RP11-145G20.1 |         |        |         |         | -1.1833 |         |
| rs28526823 | 97395638  | RP11-145G20.1 |         |        |         |         | 1.67    |         |
| rs17025552 | 97409408  | RP11-145G20.1 |         |        |         |         | -0.7591 |         |
| rs11724479 | 97419924  | RP11-145G20.1 |         |        |         |         | -0.3917 |         |
| rs6532609  | 97421141  | RP11-145G20.1 |         |        |         |         | 1.0698  |         |
| rs10022608 | 97444956  | RP11-145G20.1 |         |        |         |         | -0.098  |         |
| rs6832719  | 97458376  | RP11-145G20.1 |         |        |         |         | -9.5649 |         |
| rs6532632  | 97459243  | RP11-145G20.1 |         |        |         |         | 9.3413  |         |
| rs2004316  | 99381148  | TSPAN5        |         |        | -0.4301 |         |         |         |
| rs11935423 | 100477462 | TRMT10A       | -0.4326 |        |         |         |         |         |
| rs13126505 | 102865304 | BANK1         | -0.5155 |        |         |         |         |         |
| rs2686293  | 107511296 | RP13-612N21.1 | -0.3627 |        |         |         |         |         |
| rs1004472  | 109215088 | LEF1-AS1      |         |        |         |         |         | -2.58   |
| rs2078126  | 109215175 | LEF1-AS1      |         |        |         |         |         | 0.5862  |
| rs6831553  | 109218208 | LEF1-AS1      |         |        |         |         |         | 1.8794  |
| rs220615   | 109239451 | LEF1-AS1      |         |        |         |         |         | 0.1964  |
| rs3932216  | 109242863 | LEF1-AS1      |         |        |         |         |         | -3.1306 |
| rs11097979 | 109248691 | LEF1-AS1      |         |        |         |         |         | 3.3899  |

Web Table 9: Analysis of the GENEVA diabetes data (NHS/HPFS) using HierMCP: identified main effects and interactions.

| SNP        | Location | Gene          |         | age     | famdb   | act     | trans   | ceraf   | heme    |
|------------|----------|---------------|---------|---------|---------|---------|---------|---------|---------|
|            |          |               |         | -0.4322 | 0.3991  | -0.2762 | 0.3159  | -0.4147 | 0.33    |
| rs12645408 | 60879952 | Y_RNA         | -0.4366 |         |         |         |         | 0.2041  | -0.1355 |
| rs17090278 | 61679934 | RP11-593F5.2  | -0.4349 | 0.1885  | 0.0229  |         |         | 0.0841  |         |
| rs17828330 | 62226863 | LPHN3         | 0.4944  |         |         | -0.0854 | 0.0088  | 0.1576  |         |
| rs6828446  | 65304222 | TECRL         | -0.6452 |         |         | -0.3828 |         |         | 0.0124  |
| rs12233864 | 65608452 | RP11-63H19.1  | -0.4627 | 0.2458  |         |         | -0.1327 |         | 0.1765  |
| rs13130005 | 66100747 | RP11-498E11.2 | 0.8005  | 0.0363  |         |         | 0.0066  | -0.0442 |         |
| rs13124187 | 66208911 | EPHA5         | -0.6015 |         | -0.1894 |         |         |         |         |
| rs13107026 | 67139034 | MIR1269A      | 0.433   |         |         |         | 0.1242  | -0.0644 |         |
| rs17088752 | 68747036 | UBA6-AS1      | 0.8609  | -0.1508 | -0.1282 | 0.0236  | 0.1898  | -0.0605 | 0.051   |
| rs10033058 | 69177408 | YTHDC1        | 0.2919  |         |         | -0.0128 |         |         | 0.061   |
| rs11249453 | 70488786 | UGT2A1        | -0.4048 | 0.18    | -0.2025 | 0.286   |         | 0.0446  | 0.0205  |
| rs11249477 | 70934425 | CSN1S2AP      | -0.4281 |         | -0.0995 |         | -0.1076 | 0.3327  | 0.0075  |
| rs11249478 | 70934473 | CSN1S2AP      | 0.6009  | -0.2061 | -0.0859 | 0.2153  | 0.0246  | -0.0719 | 0.1284  |
| rs13102142 | 70951325 | CSN1S2AP      | 0.6451  |         |         | -0.4601 |         | 0.2998  | 0.3027  |
| rs4563469  | 71656101 | RUFY3         | -0.6335 | 0.1512  | 0.0161  | 0.036   |         |         |         |
| rs13119998 | 71781186 | MOB1B         | 0.6384  | -0.3633 |         |         |         |         | -0.5033 |
| rs6857348  | 72388965 | SLC4A4        | 0.0165  |         |         |         |         |         |         |
| rs2366715  | 73854103 | RNU4ATAC9P    | 0.0749  |         |         |         |         |         |         |
| rs11938646 | 74537705 | AC112518.3    | -0.5411 | -0.1758 |         |         | 0.018   | -0.2986 |         |
| rs16850160 | 74758993 | CXCL1         | -0.5147 |         |         | 0.1367  |         |         | -0.1084 |
| rs12649753 | 74940765 | RP11-629B11.4 | 0.3374  |         |         | -0.0187 |         | 0.0226  | 0.1663  |
| rs4610413  | 75555658 | AC142293.3    | -0.4844 |         |         | 0.2083  |         |         | 0.0554  |
| rs10022187 | 75688708 | BTC           | 0.5642  |         | 0.3142  | -0.0995 |         |         |         |
| rs6817948  | 75762800 | BTC           | 0.5838  |         |         | -0.2409 | 0.1108  |         | 0.0773  |
| rs17000199 | 75997311 | RP11-44F21.5  | -0.4003 |         |         |         |         |         |         |
| rs7677150  | 76644109 | G3BP2         | -0.4625 |         |         |         |         | -0.0381 |         |
| rs10028707 | 77671439 | SHROOM3       | -0.3461 |         | 0.1419  |         |         |         | 0.0152  |
| rs12500486 | 77754619 | AC104687.1    | 0.5001  | -0.1349 |         |         |         | 0.0073  | 0.1066  |
| rs4150060  | 78080963 | CCNG2         | 0.5117  |         | 0.0686  |         |         |         |         |
| rs7697415  | 78249882 | CCNG2         | -0.5616 | -0.0257 | 0.3309  | 0.0751  |         |         |         |
| rs6827052  | 79949076 | LINC01088     | 0.5551  |         | 0.0218  | -0.3137 |         | -0.3029 |         |
| rs17003679 | 80155510 | LINC01088     | -0.4822 |         |         |         |         |         |         |
| rs10857104 | 80575728 | RP11-452C8.1  | 0.2978  |         | -0.0242 | -0.2286 |         |         | 0.1105  |
| rs2867702  | 81060836 | RP11-162K6.1  | 0.4913  | -0.0498 | 0.0047  | -0.0787 |         |         |         |

Continued on the next page

Web Table 9: Continued from the previous page

| SNP        | Position  | Gene          |         | age     | famdb   | act     | trans   | ceraf   | heme    |
|------------|-----------|---------------|---------|---------|---------|---------|---------|---------|---------|
| rs10004901 | 81897005  | C4orf22       | -0.5762 | 0.0417  | -0.115  | 0.0029  |         | 0.2165  |         |
| rs35036928 | 82671170  | RP11-689K5.3  | -0.3807 | -0.0929 |         | -0.1247 |         |         | -0.0184 |
| rs1993798  | 82762741  | RP11-689K5.3  | 0.2292  | -0.0373 |         |         |         | -0.1176 |         |
| rs10516697 | 84618260  | RP11-767N15.1 | -0.4875 |         |         |         | 0.078   |         |         |
| rs17007216 | 84636196  | RP11-767N15.1 | -0.5071 |         |         |         |         |         |         |
| rs17007783 | 84881829  | RP11-8L2.1    | 0.4986  | 0.0088  | 0.1229  | 0.1573  | 0.397   |         |         |
| rs392112   | 86244117  | RP11-218C23.1 | -0.3109 | 0.0191  | -0.0036 |         | -0.0963 |         |         |
| rs4334746  | 87072464  | RP11-778J15.1 | -0.4234 | -0.0254 | -0.0671 |         | -0.0963 | 0.0895  | -0.055  |
| rs17409687 | 87250436  | MAPK10        | -0.7202 | 0.0177  | 0.0177  |         | 0.2061  |         | -0.1671 |
| rs13147739 | 87759673  | SLC10A6       | 0.6486  | 0.3326  | 0.1686  | 0.0854  |         | -0.2256 |         |
| rs7668684  | 88159940  | KLHL8         | 0.656   | 0.102   | 0.0596  |         | -0.4326 | -0.0908 |         |
| rs9995093  | 89220944  | RP11-10L7.1   | 0.5144  |         | 0.0881  |         |         | 0.0188  | 0.0252  |
| rs1552972  | 90473540  | RP11-115D19.1 | 0.1628  |         |         |         |         |         |         |
| rs10516839 | 90508340  | RP11-115D19.1 | 0.4203  |         |         | -0.079  |         |         |         |
| rs6841431  | 91116156  | CCSER1        | -0.5755 | 0.1587  | -0.2974 |         | -0.2365 | -0.0252 |         |
| rs7667572  | 92053582  | CCSER1        | -0.5232 |         |         | 0.2386  | -0.0139 | 0.0545  |         |
| rs17019545 | 93468433  | GRID2         | 0.439   |         |         |         | 0.0379  |         |         |
| rs10856909 | 95268748  | HPGDS         | 0.0401  |         |         |         |         |         |         |
| rs997464   | 96273480  | UNC5C         | -0.0134 |         |         |         |         |         |         |
| rs16996519 | 96759448  | PDHA2         | -0.4671 | 0.0639  |         | -0.0949 | -0.0433 | 0.0017  |         |
| rs10016725 | 98363606  | RP11-681L8.1  | -0.5328 | 0.0703  |         | 0.0998  | -0.0511 |         |         |
| rs13149070 | 99479684  | TSPAN5        | -0.0431 |         |         |         |         |         |         |
| rs9998528  | 99692618  | BTF3P13       | 0.0283  |         |         |         |         |         |         |
| rs7375429  | 100145719 | RP11-696N14.1 | 0.4196  |         |         |         |         |         |         |
| rs4306962  | 101228493 | EMCN          | -0.3764 | 0.0453  | -0.0462 | 0.0352  | 0.1218  | 0.0035  | -0.1781 |
| rs12645499 | 102611757 | BANK1         | 0.6012  |         |         |         | -0.1083 | -0.2208 | 0.0816  |
| rs2726516  | 106346206 | PPA2          | 0.0142  |         |         |         |         |         |         |
| rs17261094 | 106557429 | ARHGEF38      | -0.4555 |         |         |         | -0.2091 | 0.0644  |         |
| rs7690115  | 107448046 | RP13-612N21.1 | 0.0788  |         |         |         |         |         |         |
| rs17357756 | 107455176 | RP13-612N21.1 | 0.5251  | -0.0414 | -0.2133 | -0.0481 |         | 0.0566  |         |
| rs17036882 | 107541582 | RP13-612N21.1 | 0.5604  |         | -0.0895 |         |         | -0.246  |         |
| rs7669708  | 108202333 | RP11-713M6.2  | 0.6216  |         | -0.0686 |         |         |         |         |
| rs7661968  | 110866582 | EGF           | -0.7588 |         |         | -0.2884 | -0.069  | -0.1115 |         |

Web Table 10: Analysis of the GENEVA diabetes data (NHS/HPFS) using SMCP: identified main effects and interactions.

| SNP        | Location | Gene          | age     | famdb   | act     | trans  | ceraf   | heme   |
|------------|----------|---------------|---------|---------|---------|--------|---------|--------|
|            |          |               | -0.2785 | 0.2019  | -0.4544 | 0.2361 | -0.3411 | 0.4440 |
| rs1507131  | 60564866 | RP11-525J21.1 |         | -0.0005 |         |        |         |        |
| rs2045634  | 60847314 | Y_RNA         |         |         |         |        |         | 0.0004 |
| rs1460346  | 60852284 | Y_RNA         |         |         |         |        |         | 0.0003 |
| rs9996745  | 61115698 | Y_RNA         | -0.0003 |         |         |        |         |        |
| rs10021002 | 61129136 | AC095061.1    | -0.0009 |         |         |        |         |        |
| rs41318750 | 61219473 | AC095061.1    | -0.0003 |         |         |        |         |        |
| rs10019682 | 61228770 | AC095061.1    | -0.0029 |         |         |        |         |        |
| rs11946495 | 61238161 | AC095061.1    | -0.0059 |         |         |        |         |        |
| rs4318680  | 61249881 | AC095061.1    | -0.0045 |         |         |        |         |        |
| rs10517495 | 61270978 | AC095061.1    | -0.0003 |         |         |        |         |        |
| rs1511104  | 61287186 | AC095061.1    | -0.0008 |         |         |        |         |        |
| rs1546511  | 61327179 | AC095061.1    | -0.0007 |         |         |        |         |        |
| rs10021608 | 61352529 | AC095061.1    | -0.0008 |         |         |        |         |        |
| rs10780045 | 61365594 | AC095061.1    | 0.0006  |         |         |        |         |        |
| rs17090278 | 61679934 | RP11-593F5.2  | -0.0002 |         |         |        |         |        |
| rs17090286 | 61695978 | RP11-593F5.2  | -0.0002 |         |         |        |         |        |
| rs13122165 | 61762061 | RP11-593F5.2  | -0.0004 |         |         |        |         |        |
| rs1378365  | 61775645 | RP11-593F5.2  | 0.0001  |         |         |        |         |        |
| rs12642037 | 62503837 | LPHN3         |         |         |         |        | 0.0002  |        |
| rs4860422  | 62524423 | LPHN3         |         |         |         |        | 0.0008  |        |
| rs11131340 | 62535059 | LPHN3         |         |         |         |        | 0.0015  |        |
| rs2036199  | 62540857 | LPHN3         |         |         |         |        | 0.0009  |        |
| rs996208   | 62559531 | LPHN3         |         |         |         |        | 0.0001  |        |
| rs17226412 | 62907023 | LPHN3         |         |         |         | 0.0002 |         |        |
| rs7681041  | 62982567 | RP11-84A1.3   |         |         |         |        | 0.0006  |        |
| rs7681041  | 62982567 | RP11-84A1.3   |         |         |         |        | 0.0007  |        |
| rs950313   | 63025823 | RP11-84A1.3   |         |         |         |        | 0.0001  |        |
| rs1124974  | 63037324 | RP11-84A1.3   |         |         |         |        | 0.0003  |        |
| rs9995712  | 63062142 | RP11-84A1.3   |         |         |         |        | 0.0003  |        |
| rs778937   | 63242346 | RP11-30P21.2  |         |         |         |        | 0.0006  |        |
| rs2604592  | 63312469 | HMG1P11       |         |         |         |        | 0.0005  |        |
| rs778567   | 63312966 | HMG1P11       |         |         |         |        | 0.0004  |        |
| rs6818094  | 64726856 | RP11-12K22.1  |         | -0.0002 |         |        |         |        |
| rs1878564  | 64791788 | TECRL         |         | -0.0003 |         |        |         |        |

Continued on the next page



Web Table 10: Continued from the previous page

| SNP        | Position | Gene          | age     | famdb   | act    | trans  | ceraf | heme    |
|------------|----------|---------------|---------|---------|--------|--------|-------|---------|
| rs10002424 | 65744523 | RP11-707A18.1 |         |         |        |        |       | -0.0003 |
| rs10028673 | 65748015 | RP11-707A18.1 |         |         |        |        |       | -0.0005 |
| rs11721709 | 65775277 | RP11-707A18.1 |         |         |        |        |       | -0.0004 |
| rs10005825 | 65778213 | RP11-707A18.1 |         |         |        |        |       | -0.0005 |
| rs1376412  | 66267015 | EPHA5         |         | -0.0006 |        |        |       |         |
| rs17086181 | 66267300 | EPHA5         |         | -0.0007 |        |        |       |         |
| rs6551926  | 66292123 | EPHA5         |         | 0.0013  |        |        |       |         |
| rs7659865  | 66292306 | EPHA5         |         | 0.0012  |        |        |       |         |
| rs7667410  | 66486986 | EPHA5         |         |         |        | 0.0009 |       |         |
| rs4422467  | 66494645 | EPHA5         |         |         |        | 0.001  |       |         |
| rs7659227  | 66496170 | EPHA5         |         |         |        | 0.0008 |       |         |
| rs4370201  | 66500571 | EPHA5         |         |         |        | 0.0003 |       |         |
| rs11131612 | 66525024 | EPHA5         |         |         |        | 0.0002 |       |         |
| rs13107026 | 67139034 | MIR1269A      | 0.0001  |         |        |        |       |         |
| rs1397755  | 67140834 | MIR1269A      | 0.0003  |         |        |        |       |         |
| rs12331987 | 67188980 | MIR1269A      | 0.002   |         |        |        |       |         |
| rs10000219 | 67200024 | MIR1269A      | 0.005   |         |        |        |       |         |
| rs4860208  | 67201368 | MIR1269A      | 0.0063  |         |        |        |       |         |
| rs1511286  | 67213473 | MIR1269A      | 0.0041  |         |        |        |       |         |
| rs11936928 | 67489994 | RPS23P3       | 0.0014  |         |        |        |       |         |
| rs6838523  | 67494918 | RPS23P3       | 0.0014  |         |        |        |       |         |
| rs920482   | 68241081 | RP11-584P21.2 |         |         | 0.0001 |        |       |         |
| rs6419917  | 68241545 | RP11-584P21.2 |         |         | 0.0003 |        |       |         |
| rs1348079  | 68718552 | UBA6-AS1      |         | -0.0004 |        |        |       |         |
| rs9312190  | 68718911 | UBA6-AS1      |         | -0.0007 |        |        |       |         |
| rs10033058 | 69177408 | YTHDC1        | 0.0011  |         |        |        |       |         |
| rs2293595  | 69178920 | YTHDC1        | 0.0011  |         |        |        |       |         |
| rs17089267 | 69183791 | YTHDC1        | 0.0002  |         |        |        |       |         |
| rs2013562  | 70354575 | UGT2B4        | -0.0002 |         |        |        |       |         |
| rs2046911  | 70848044 | STATH         |         | 0.0004  |        |        |       |         |
| rs776822   | 70861285 | STATH         |         | 0.0005  |        |        |       |         |
| rs1842478  | 71227802 | SMR3A         |         |         |        |        |       | -0.0013 |
| rs6446910  | 73833081 | RNU4ATAC9P    | 0.0002  |         |        |        |       |         |
| rs1957659  | 74472081 | RASSF6        |         | 0.0004  |        |        |       |         |
| rs17805665 | 74472268 | RASSF6        |         | 0.0005  |        |        |       |         |

Continued on the next page

Web Table 10: Continued from the previous page

| SNP        | Position | Gene          | age     | famdb   | act    | trans  | ceraf  | heme |
|------------|----------|---------------|---------|---------|--------|--------|--------|------|
| rs2010989  | 74472896 | RASSF6        |         | 0.0003  |        |        |        |      |
| rs12649753 | 74940765 | RP11-629B11.4 | 0.0003  |         |        |        |        |      |
| rs12641287 | 75259691 | EREG          |         | 0.0001  |        |        |        |      |
| rs16996019 | 76644744 | G3BP2         |         |         |        |        | 0.0002 |      |
| rs17000786 | 76667709 | USO1          |         |         |        |        | 0.0002 |      |
| rs11938067 | 76669538 | USO1          |         |         |        |        | 0.0001 |      |
| rs13110602 | 76704860 | USO1          |         |         |        |        | 0.0001 |      |
| rs324735   | 76705014 | USO1          |         |         |        |        | 0.0002 |      |
| rs12506745 | 77220837 | FAM47E-STBD1  | -0.0005 |         |        |        |        |      |
| rs1376412  | 66267015 | EPHA5         |         | -0.0006 |        |        |        |      |
| rs17086181 | 66267300 | EPHA5         |         | -0.0007 |        |        |        |      |
| rs6551926  | 66292123 | EPHA5         |         | 0.0013  |        |        |        |      |
| rs7659865  | 66292306 | EPHA5         |         | 0.0012  |        |        |        |      |
| rs7667410  | 66486986 | EPHA5         |         |         |        | 0.0009 |        |      |
| rs4422467  | 66494645 | EPHA5         |         |         |        | 0.001  |        |      |
| rs7659227  | 66496170 | EPHA5         |         |         |        | 0.0008 |        |      |
| rs4370201  | 66500571 | EPHA5         |         |         |        | 0.0003 |        |      |
| rs11131612 | 66525024 | EPHA5         |         |         |        | 0.0002 |        |      |
| rs13107026 | 67139034 | MIR1269A      | 0.0001  |         |        |        |        |      |
| rs1397755  | 67140834 | MIR1269A      | 0.0003  |         |        |        |        |      |
| rs12331987 | 67188980 | MIR1269A      | 0.002   |         |        |        |        |      |
| rs10000219 | 67200024 | MIR1269A      | 0.005   |         |        |        |        |      |
| rs4860208  | 67201368 | MIR1269A      | 0.0063  |         |        |        |        |      |
| rs1511286  | 67213473 | MIR1269A      | 0.0041  |         |        |        |        |      |
| rs11936928 | 67489994 | RPS23P3       | 0.0014  |         |        |        |        |      |
| rs6838523  | 67494918 | RPS23P3       | 0.0014  |         |        |        |        |      |
| rs920482   | 68241081 | RP11-584P21.2 |         |         | 0.0001 |        |        |      |
| rs6419917  | 68241545 | RP11-584P21.2 |         |         | 0.0003 |        |        |      |
| rs1348079  | 68718552 | UBA6-AS1      |         | -0.0004 |        |        |        |      |
| rs9312190  | 68718911 | UBA6-AS1      |         | -0.0007 |        |        |        |      |
| rs10033058 | 69177408 | YTHDC1        | 0.0011  |         |        |        |        |      |
| rs2293595  | 69178920 | YTHDC1        | 0.0011  |         |        |        |        |      |
| rs17089267 | 69183791 | YTHDC1        | 0.0002  |         |        |        |        |      |
| rs2013562  | 70354575 | UGT2B4        | -0.0002 |         |        |        |        |      |
| rs2046911  | 70848044 | STATH         |         | 0.0004  |        |        |        |      |
| rs776822   | 70861285 | STATH         |         | 0.0005  |        |        |        |      |

Continued on the next page

Web Table 10: Continued from the previous page

| SNP          | Position | Gene          | age     | famdb   | act | trans   | ceraf  | heme    |
|--------------|----------|---------------|---------|---------|-----|---------|--------|---------|
| rs1842478    | 71227802 | SMR3A         |         |         |     |         |        | -0.0013 |
| rs6446910    | 73833081 | RNU4ATAC9P    | 0.0002  |         |     |         |        |         |
| rs1957659    | 74472081 | RASSF6        |         | 0.0004  |     |         |        |         |
| rs17805665   | 74472268 | RASSF6        |         | 0.0005  |     |         |        |         |
| rs2010989    | 74472896 | RASSF6        |         | 0.0003  |     |         |        |         |
| rs12649753   | 74940765 | RP11-629B11.4 | 0.0003  |         |     |         |        |         |
| rs12641287   | 75259691 | EREG          |         | 0.0001  |     |         |        |         |
| rs16996019   | 76644744 | G3BP2         |         |         |     |         | 0.0002 |         |
| rs17000786   | 76667709 | USO1          |         |         |     |         | 0.0002 |         |
| rs11938067   | 76669538 | USO1          |         |         |     |         | 0.0001 |         |
| rs13110602   | 76704860 | USO1          |         |         |     |         | 0.0001 |         |
| rs324735     | 76705014 | USO1          |         |         |     |         | 0.0002 |         |
| rs12506745   | 77220837 | FAM47E-STBD1  | -0.0005 |         |     |         |        |         |
| rs907446     | 77254804 | CCDC158       | -0.0002 |         |     |         |        |         |
| rs6857452    | 77317124 | CCDC158       | -0.0002 |         |     |         |        |         |
| rs6853053    | 77489645 | SHROOM3       |         |         |     |         |        | -0.0007 |
| rs6824297    | 77492155 | SHROOM3       |         |         |     |         |        | -0.0009 |
| rs13148163   | 77504400 | SHROOM3       |         |         |     |         |        | -0.0012 |
| rs2645645    | 77859067 | 11-Sep        |         |         |     | -0.0004 |        |         |
| rs2703141    | 77860806 | 11-Sep        |         |         |     | -0.0003 |        |         |
| rs4272042    | 78053975 | RNU6-1187P    |         | 0.0007  |     |         |        |         |
| rs6831175    | 78389293 | RP11-625I7.1  |         |         |     | 0.0001  |        |         |
| rs1051225463 | 79458537 | FRAS1         | -0.0004 |         |     |         |        |         |
| rs7694246    | 80686562 | PCAT4         |         |         |     |         |        | -0.0005 |
| rs4285108    | 80688257 | PCAT4         |         |         |     |         |        | -0.0006 |
| rs6534560    | 80688396 | PCAT4         |         |         |     |         |        | -0.0005 |
| rs7682543    | 81154975 | FGF5          |         |         |     | 0.0003  |        |         |
| rs11937407   | 81413618 | C4orf22       |         | -0.0005 |     |         |        |         |
| rs6858262    | 81441388 | C4orf22       |         | -0.001  |     |         |        |         |
| rs6534992    | 81441764 | C4orf22       |         | -0.0009 |     |         |        |         |
| rs17004924   | 81445307 | C4orf22       |         | -0.0004 |     |         |        |         |
| rs1843563    | 81454827 | C4orf22       |         | -0.0004 |     |         |        |         |
| rs1391262    | 82663506 | RP11-689K5.3  | -0.0004 |         |     |         |        |         |
| rs35036928   | 82671170 | RP11-689K5.3  | -0.0023 |         |     |         |        |         |
| rs4693369    | 82671234 | RP11-689K5.3  | -0.0022 |         |     |         |        |         |

Continued on the next page

Web Table 10: Continued from the previous page

| SNP        | Position | Gene          | age     | famdb | act | trans   | ceraf | heme |
|------------|----------|---------------|---------|-------|-----|---------|-------|------|
| rs7672440  | 82671938 | RP11-689K5.3  | -0.0004 |       |     |         |       |      |
| rs676592   | 82733530 | RP11-689K5.3  | -0.0014 |       |     |         |       |      |
| rs1993798  | 82762741 | RP11-689K5.3  | 0.0012  |       |     |         |       |      |
| rs2868257  | 82762839 | RP11-689K5.3  | 0.002   |       |     |         |       |      |
| rs6535281  | 82763010 | RP11-689K5.3  | 0.0013  |       |     |         |       |      |
| rs11722328 | 82818968 | RP11-689K5.3  | 0.0003  |       |     |         |       |      |
| rs2199487  | 82820008 | RP11-689K5.3  | 0.0003  |       |     |         |       |      |
| rs2035911  | 83115185 | RNU6-499P     |         |       |     | -0.0003 |       |      |
| rs17359809 | 84554429 | Y_RNA         | 0.0002  |       |     |         |       |      |
| rs4693655  | 84820059 | RP11-8L2.1    |         |       |     | 0.0003  |       |      |
| rs4693656  | 84820334 | RP11-8L2.1    |         |       |     | 0.0005  |       |      |
| rs4272003  | 84822518 | RP11-8L2.1    |         |       |     | 0.0004  |       |      |
| rs1838039  | 85625701 | WDFY3         |         |       |     | 0.0004  |       |      |
| rs6857037  | 86069378 | RP11-218C23.1 |         |       |     | -0.0002 |       |      |
| rs4485812  | 86101088 | RP11-218C23.1 |         |       |     | -0.0004 |       |      |
| rs6822829  | 86101771 | RP11-218C23.1 |         |       |     | 0.0002  |       |      |
| rs7656038  | 86143981 | RP11-218C23.1 |         |       |     | -0.0002 |       |      |
| rs6531805  | 86153851 | RP11-218C23.1 |         |       |     | -0.0003 |       |      |
| rs13115311 | 86156826 | RP11-218C23.1 |         |       |     | -0.0002 |       |      |
| rs392112   | 86244117 | RP11-218C23.1 | -0.0004 |       |     |         |       |      |
| rs433657   | 86252435 | RP11-218C23.1 | -0.0007 |       |     |         |       |      |
| rs434193   | 86253489 | RP11-218C23.1 | -0.001  |       |     |         |       |      |
| rs6842681  | 86253994 | RP11-218C23.1 | -0.0011 |       |     |         |       |      |
| rs425196   | 86255297 | RP11-218C23.1 | -0.0012 |       |     |         |       |      |
| rs416035   | 86255366 | RP11-218C23.1 | -0.0014 |       |     |         |       |      |
| rs432755   | 86255399 | RP11-218C23.1 | -0.0014 |       |     |         |       |      |
| rs375432   | 86255845 | RP11-218C23.1 | -0.0011 |       |     |         |       |      |
| rs425642   | 86255997 | RP11-218C23.1 | -0.0008 |       |     |         |       |      |
| rs407430   | 86256356 | RP11-218C23.1 | -0.0008 |       |     |         |       |      |
| rs400023   | 86256538 | RP11-218C23.1 | -0.0008 |       |     |         |       |      |
| rs585787   | 86257453 | RP11-218C23.1 | -0.0004 |       |     |         |       |      |
| rs340199   | 86350683 | ARHGAP24      |         |       |     | -0.0009 |       |      |
| rs340200   | 86351156 | ARHGAP24      |         |       |     | -0.0017 |       |      |
| rs340202   | 86353796 | ARHGAP24      |         |       |     | -0.0014 |       |      |
| rs340203   | 86353867 | ARHGAP24      |         |       |     | -0.001  |       |      |
| rs10222732 | 88295008 | HSD17B11      | -0.0003 |       |     |         |       |      |
| rs10017282 | 88347368 | NUDT9         | 0.0002  |       |     |         |       |      |

Continued on the next page

Web Table 10: Continued from the previous page

| SNP        | Position  | Gene          | age     | famdb  | act     | trans   | ceraf   | heme   |
|------------|-----------|---------------|---------|--------|---------|---------|---------|--------|
| rs7656367  | 89196821  | PPM1K         |         |        |         |         |         | 0.0008 |
| rs893971   | 89203670  | RP11-10L7.1   |         |        |         |         |         | 0.0005 |
| rs9994576  | 91822311  | CCSER1        |         |        |         |         |         | 0.0003 |
| rs13119689 | 94719474  | RNA5SP164     |         |        |         | -0.0009 |         |        |
| rs10031584 | 94719872  | RNA5SP164     |         |        |         | -0.001  |         |        |
| rs2632401  | 95147055  | SMARCAD1      |         |        |         | -0.0001 |         |        |
| rs3775051  | 96126206  | UNC5C         |         |        | -0.0001 |         |         |        |
| rs1369985  | 96545816  | RPL30P6       | 0.0001  |        |         |         |         |        |
| rs1816849  | 97122531  | RNU6-34P      |         |        |         |         | -0.0006 |        |
| rs1823757  | 97122591  | RNU6-34P      |         |        |         |         | -0.0012 |        |
| rs1395199  | 97177286  | RP11-145G20.1 |         |        |         |         | 0.0008  |        |
| rs6532609  | 97421141  | RP11-145G20.1 |         |        |         |         | 0.0007  |        |
| rs10022608 | 97444956  | RP11-145G20.1 |         |        |         |         | 0.001   |        |
| rs6832719  | 97458376  | RP11-145G20.1 |         |        |         |         | 0.0003  |        |
| rs4596245  | 97797275  | COX7A2P2      |         |        | -0.0001 |         |         |        |
| rs6841643  | 97806589  | COX7A2P2      |         |        | -0.0001 |         |         |        |
| rs7685402  | 99660764  | BTF3P13       |         | 0.0007 |         |         |         |        |
| rs6532833  | 100747972 | DAPP1         |         |        |         |         | -0.0007 |        |
| rs6532833  | 100747972 | DAPP1         |         |        |         |         | -0.0007 |        |
| rs3822103  | 100754665 | DAPP1         |         |        |         | -0.0004 |         |        |
| rs1348161  | 102252696 | MIR1255A      |         | 0.0002 |         |         |         |        |
| rs2850329  | 102275264 | MIR1255A      |         | 0.0008 |         |         |         |        |
| rs6845263  | 102276682 | MIR1255A      |         | 0.0013 |         |         |         |        |
| rs10433982 | 102283898 | MIR1255A      |         | 0.0007 |         |         |         |        |
| rs6845368  | 102285899 | MIR1255A      |         | 0.0002 |         |         |         |        |
| rs6846097  | 102286050 | MIR1255A      |         | 0.0002 |         |         |         |        |
| rs7377083  | 102708997 | BANK1         | -0.0003 |        |         |         |         |        |
| rs4615176  | 102737936 | BANK1         |         |        |         | -0.0009 |         |        |
| rs4411998  | 102738147 | BANK1         |         |        |         | -0.0015 |         |        |
| rs4276281  | 102746780 | BANK1         |         |        |         | -0.0011 |         |        |
| rs11735227 | 103125383 | SLC39A8       |         |        |         | -0.0005 |         |        |
| rs151414   | 103137879 | SLC39A8       |         |        |         |         |         | 0.0004 |
| rs151413   | 103137941 | SLC39A8       |         |        |         |         |         | 0.0006 |

Continued on the next page

Web Table 10: Continued from the previous page

| SNP        | Position  | Gene          | age     | famdb   | act     | trans | ceraf | heme   |
|------------|-----------|---------------|---------|---------|---------|-------|-------|--------|
| rs1540052  | 103137977 | SLC39A8       |         |         |         |       |       | 0.0004 |
| rs9997118  | 105898577 | RNU6-351P     | 0.0006  |         |         |       |       |        |
| rs902444   | 105923047 | RP11-556I14.1 | 0.0004  |         |         |       |       |        |
| rs2636696  | 106297308 | PPA2          |         | -0.0004 |         |       |       |        |
| rs2713834  | 106310520 | PPA2          |         | -0.0003 |         |       |       |        |
| rs2636732  | 106336855 | PPA2          |         | -0.0002 |         |       |       |        |
| rs2726516  | 106346206 | PPA2          | 0.0008  | -0.0011 |         |       |       |        |
| rs2636739  | 106352105 | PPA2          | 0.0008  | -0.0011 |         |       |       |        |
| rs2636743  | 106356581 | PPA2          |         | -0.0004 |         |       |       |        |
| rs2686293  | 107511296 | RP13-612N21.1 | -0.0007 |         |         |       |       |        |
| rs7671347  | 108792735 | RP11-286E11.1 |         |         | -0.0001 |       |       |        |
| rs17509519 | 109192790 | LEF1-AS1      |         |         | 0.0001  |       |       |        |
| rs3851415  | 109194387 | LEF1-AS1      |         |         | 0.0002  |       |       |        |
| rs1027681  | 109195380 | LEF1-AS1      |         |         | 0.0002  |       |       |        |
| rs1004472  | 109215088 | LEF1-AS1      |         |         |         |       |       | 0.004  |
| rs2078126  | 109215175 | LEF1-AS1      |         |         |         |       |       | 0.0073 |
| rs6831553  | 109218208 | LEF1-AS1      |         |         |         |       |       | 0.0075 |
| rs7699097  | 109227508 | LEF1-AS1      |         |         |         |       |       | 0.0045 |
| rs16996944 | 109232275 | LEF1-AS1      |         |         |         |       |       | 0.0009 |
| rs220630   | 109232304 | LEF1-AS1      |         |         |         |       |       | 0.0009 |
| rs11726135 | 109232492 | LEF1-AS1      |         |         |         |       |       | 0.0009 |
| rs220615   | 109239451 | LEF1-AS1      |         |         |         |       |       | 0.002  |
| rs3932216  | 109242863 | LEF1-AS1      |         |         |         |       |       | 0.002  |
| rs11097979 | 109248691 | LEF1-AS1      |         |         |         |       |       | 0.0006 |
| rs11938222 | 110555678 | CCDC109B      |         |         |         |       |       | 0.0002 |

Web Table 11: Analysis of the TCGA SKCM data using MA: identified main effects and interactions

| Gene        |          | Age     | PN      | Gender  | Breslow's depth | Clark level |
|-------------|----------|---------|---------|---------|-----------------|-------------|
|             |          | 0.0019  | -0.0331 | 3.3675  | 0.0744          | -0.0098     |
| ACTA1       | -0.0167  |         |         |         |                 |             |
| ANKRD30A    | -0.1554  |         |         |         |                 |             |
| BCYRN1      | 0.0163   |         | 0.0247  |         |                 |             |
| C2ORF83     | -0.0251  |         | 0.0307  | -0.0059 |                 |             |
| C3ORF79     | -0.9345  |         |         |         |                 |             |
| CFC1B       | -0.2176  |         |         |         |                 |             |
| CT47A6      | 1.5287   |         |         |         |                 |             |
| DMRTB1      | -0.8216  |         |         |         |                 |             |
| DPPA3       | 0.0363   |         |         |         |                 |             |
| FABP12      | -0.0525  |         |         | -0.0243 |                 |             |
| FANCD2OS    | -0.1159  |         |         |         |                 |             |
| FTHL17      | -0.14    |         |         |         |                 |             |
| GSX1        | 0.2476   | 0.4562  |         | -0.1929 |                 | 0.0096      |
| HES3        | -10.2916 |         |         | 12.7309 |                 |             |
| KCNK18      | 0.0573   |         |         |         |                 |             |
| OR4X2       | -0.0459  |         | 0.0152  |         |                 |             |
| OR5B2       |          |         | 0.0648  |         |                 | 0.0562      |
| OR8B12      | -0.0085  |         |         |         |                 |             |
| PIAS3       | -0.0258  |         |         |         |                 |             |
| RGS21       | -0.1029  |         |         |         | -0.1823         |             |
| RNASE11     | 0.3474   | -0.2649 | 0.2106  | 0.1886  | 0.8826          |             |
| SLC17A6     | 0.0685   |         |         |         |                 |             |
| SPATA31D3   | -0.0026  |         | 0.0089  |         |                 |             |
| TAS2R7      | 0.0481   | -0.037  |         |         |                 | -0.0356     |
| TMEM30CP    | 0.0446   |         |         |         |                 |             |
| TMIGD1      | -0.0422  |         | -0.0021 | 0.037   |                 |             |
| TMPRSS11BNL | 0.2116   |         |         |         |                 |             |
| VTA1        | 0.0431   |         |         |         |                 |             |

Web Table 12: Analysis of the TCGA SKCM data using HierMCP: identified main effects and interactions

| Gene     |         | Age     | PN      | Gender  | Breslow's depth | Clark level |
|----------|---------|---------|---------|---------|-----------------|-------------|
|          |         | -0.3087 | -0.4998 | -0.1149 | -0.1555         | -0.067      |
| ABCC13   | -0.4337 |         |         |         |                 |             |
| ADGRF2   | 0.532   |         |         |         |                 |             |
| APBA2    | -0.0472 |         |         |         |                 |             |
| APC      | -0.0702 |         |         |         |                 |             |
| AQP10    | -3.2088 |         |         | 0.0446  |                 | 0.2722      |
| ARHGAP5  | 0.0358  |         |         |         |                 |             |
| ATF2     | 0.0206  |         |         |         |                 |             |
| ATP6V0A4 | 0.1658  |         |         |         |                 |             |
| AUNIP    | -0.0846 |         |         |         |                 |             |
| BMI1     | -0.0546 |         |         |         |                 |             |
| BRCC3    | -0.0459 |         |         |         |                 |             |
| BRINP3   | 0.3568  |         |         |         |                 | 0.0364      |
| C1QL4    | -0.0327 |         |         |         |                 |             |
| CES3     | 0.1063  | 0.0046  |         |         |                 |             |
| CFC1B    | 0.0567  |         |         |         |                 |             |
| CGB7     | 0.0412  |         |         |         |                 |             |
| CHD9     | -0.0406 |         |         |         |                 |             |
| CLCA1    | 1.2615  |         |         |         |                 |             |
| CLDN20   | -0.4075 | -0.057  |         |         |                 |             |
| CLIC4    | 0.0471  |         |         |         |                 |             |
| CT47A6   | -0.644  |         |         |         |                 |             |
| CTXN3    | -0.7147 |         |         |         |                 |             |
| DGLUCY   | 0.0498  |         |         |         |                 |             |
| DLGAP3   | 0.2987  |         |         |         |                 |             |
| DMRTB1   | -0.3941 |         |         |         |                 |             |
| EHMT1    | -0.1286 | -0.0028 |         |         |                 |             |
| ENTPD3   | 0.603   |         |         |         |                 |             |
| ENTPD5   | -0.0919 | -0.0162 | -0.0019 |         |                 |             |
| EVA1B    | -0.1816 |         |         |         |                 |             |
| FDX1     | 0.2654  |         | -0.0055 | 0.0084  |                 |             |
| FERMT2   | 0.0896  |         | -0.0066 |         |                 |             |
| FGF2     | -0.1431 |         |         |         |                 |             |
| FHL5     | -0.0491 |         |         |         |                 |             |
| FNDC3A   | -0.0964 |         |         |         |                 |             |

Continued on the next page



Web Table 12: Continued from the previous page

| Gene      | Age     | PN     | Gender  | Breslow's depth | Clark level |
|-----------|---------|--------|---------|-----------------|-------------|
| GLB1L3    | -0.4256 |        |         |                 | 0.001       |
| GPR15     | -0.1709 |        |         |                 |             |
| GTF2A1    | 0.0756  |        |         |                 |             |
| GTF3C5    | 0.0442  |        |         |                 |             |
| GUCA1A    | 0.0364  |        |         |                 |             |
| HADHA     | -0.0758 |        |         |                 |             |
| INSR      | 0.074   |        |         |                 |             |
| ISM2      | -0.308  |        |         |                 |             |
| KRBA1     | 0.0307  |        |         |                 |             |
| KTN1      | 0.107   | 0.0215 |         |                 |             |
| LGI3      | -0.0563 |        |         |                 |             |
| LINC00265 | -0.0597 |        | -0.0023 |                 |             |
| LRFN2     | 0.2679  |        |         |                 |             |
| LRP12     | 0.0397  |        |         |                 |             |
| LYPLA2    | -0.107  | 0.0053 | -0.0195 | 0.0021          |             |
| MAJIN     | 0.3281  |        |         |                 |             |
| MAP2K4    | -0.057  |        |         | -0.0074         |             |
| MARF1     | 0.0588  |        |         |                 |             |
| MIA3      | 0.066   |        |         |                 |             |
| MTG1      | -0.1014 |        |         |                 |             |
| MTO1      | 0.0831  |        |         |                 |             |
| MTR       | 0.0853  |        | -0.0036 | 0.0222          |             |
| MYL2      | 0.3822  |        |         |                 |             |
| NEK7      | -0.037  |        |         |                 |             |
| NFAT5     | -0.0695 |        |         |                 | 0.017       |
| NR3C1     | -0.0935 |        |         | -0.0032         |             |
| OR2T6     | -0.1199 |        |         |                 |             |
| OR5A1     | -0.1817 |        | 0.0021  |                 | -0.0012     |
| OTX1      | 0.2702  |        |         | 0.0027          | -0.0026     |
| PAFAH1B2  | -0.0497 |        |         |                 |             |
| PCDHB16   | 0.0398  |        |         |                 |             |
| PCDHB5    | -0.1094 |        |         |                 | 0.0087      |
| PCGEM1    | -1.0071 |        | -0.7877 |                 |             |
| PEX14     | 0.0982  |        |         |                 |             |
| PHF3      | 0.0952  |        | -0.0015 | -0.0012         | -0.001      |
| PHOX2A    | 0.2075  |        |         |                 |             |
| PJA2      | 0.0886  |        |         |                 |             |
| PKD1L3    | 0.2358  |        |         | -0.0198         |             |
| PMPCA     | 0.0374  |        |         |                 |             |
| POGLUT1   | -0.0382 |        |         |                 |             |

Continued on the next page

Web Table 12: Continued from the previous page

| Gene      | Age     | PN      | Gender  | Breslow's depth | Clark level |
|-----------|---------|---------|---------|-----------------|-------------|
| PPIAL4G   | -0.104  |         | 0.0061  |                 | -0.0126     |
| PPM1A     | 0.0605  |         |         |                 |             |
| PPY       | 0.1489  |         |         |                 |             |
| PTPN11    | -0.1561 | -0.0281 |         |                 |             |
| RAB18     | -0.1036 |         |         | 0.0033          |             |
| RBPM52    | 0.2032  | -0.006  | -0.035  |                 | 0.0148      |
| REG1A     | 0.111   |         |         |                 |             |
| RFPL1S    | -0.1125 | 0.0303  |         | -0.0169         | 0.0019      |
| RGS14     | 0.0724  |         |         |                 |             |
| RIC8B     | 0.1271  |         | -0.0079 |                 | 0.0249      |
| RNASE7    | -0.0012 |         |         |                 |             |
| ROCK1     | -0.071  | 0.0078  |         |                 |             |
| RORB      | -0.0434 |         |         |                 |             |
| RSRC1     | -0.1321 | 0.0458  |         | -0.0038         |             |
| RWDD2A    | 0.0929  |         | 0.0212  |                 |             |
| SEC61B    | 0.1049  |         |         |                 |             |
| SEC62     | -0.0759 |         |         | -0.0072         |             |
| SERPINB10 | -0.1255 |         |         |                 |             |
| SERPINB2  | -0.1047 |         |         |                 |             |
| SH3TC2    | 0.0919  | -0.0192 |         |                 |             |
| SLC22A1   | 1.151   |         |         |                 |             |
| SLC22A13  | 0.6331  |         |         |                 |             |
| SLC2A13   | 0.0385  |         |         |                 |             |
| SLC37A4   | 0.1188  |         |         |                 |             |
| SLU7      | -0.1255 |         | -0.0027 |                 |             |
| SNAPC1    | -0.0694 |         |         |                 |             |
| SPATS1    | -0.1707 | -0.0022 | -0.0085 |                 | -0.0042     |
| SPRYD4    | -0.0799 |         |         |                 |             |
| TBC1D19   | 0.0532  |         |         |                 |             |
| TCEA3     | -0.1186 |         |         | -0.0014         | -0.0025     |
| TCTA      | -0.116  |         |         | 0.0143          | -0.0092     |
| TENT2     | -0.095  |         |         |                 | 0.0453      |
| TEX13B    | 0.2882  |         |         |                 |             |
| TFDP3     | -0.4634 |         |         | 0.0683          |             |
| TLX1      | -0.4839 |         |         |                 |             |
| TLX1NB    | 1.2187  |         |         |                 |             |
| TMEM184C  | -0.1015 | 0.0029  |         | -0.0057         | -0.0024     |

Continued on the next page

Web Table 12: Continued from the previous page

| Gene    | Age     | PN      | Gender  | Breslow's depth | Clark level |
|---------|---------|---------|---------|-----------------|-------------|
| TMEM223 | -0.6452 |         |         |                 |             |
| TMPRSS3 | -0.4446 |         |         |                 |             |
| TMPRSS9 | -0.5598 |         |         |                 |             |
| TMX1    | 0.0931  |         |         |                 |             |
| TRIM68  | 0.0481  |         |         |                 |             |
| TSC22D2 | -0.0711 |         |         |                 |             |
| TULP1   | 0.108   |         |         |                 |             |
| UBE2V1  | -0.0379 |         |         |                 |             |
| UCP1    | -1.6798 |         |         |                 |             |
| UPRT    | 0.1142  | 0.032   | -0.0438 | 0.0166          |             |
| USP12   | 0.0891  | 0.0272  |         |                 |             |
| VWA2    | 2.4251  | -0.1801 |         |                 | 0.02        |
| WBP1    | -0.125  |         |         |                 |             |
| WDR7    | -0.1281 | 0.0117  | -0.0031 | -0.0072         |             |
| WFDC2   | -0.0802 |         |         |                 |             |
| WNT6    | -0.2608 | 0.0707  | -0.0213 |                 |             |
| ZBTB1   | 0.0563  |         |         |                 |             |
| ZNF25   | 0.3841  | -0.0495 | -0.0181 | 0.0469          | 0.0421      |
| ZNF335  | -0.0394 |         |         |                 |             |

Web Table 13: Analysis of the TCGA SKCM data using SMCP: identified main effects and interactions

| Gene      | Age     | PN      | Gender  | Breslow's depth | Clark level |
|-----------|---------|---------|---------|-----------------|-------------|
|           | -0.1093 | -0.3384 | -0.0212 | -0.0644         | -0.1736     |
| ACTL6B    | 0.0027  |         |         | -0.0011         |             |
| BARHL2    | -0.001  |         |         |                 |             |
| C10ORF99  | 0.0013  |         |         |                 |             |
| CHRNA4    | -0.0014 |         |         |                 |             |
| CLCA2     | -0.0015 |         |         |                 |             |
| COX8C     | -0.001  |         |         |                 |             |
| CSPG4     | 0.001   |         |         |                 |             |
| CSTF1     | -0.0013 |         |         |                 |             |
| CYP26C1   |         |         | -0.001  |                 |             |
| DHX35     | -0.0012 |         |         |                 |             |
| DSG3      | -0.0021 |         |         |                 |             |
| ERGIC3    | -0.001  |         |         |                 |             |
| FAM131B   |         |         | 0.0011  |                 |             |
| FAM19A4   |         |         |         |                 | 0.0011      |
| FBXO22    | 0.0011  |         |         |                 |             |
| GNGT1     |         | 0.0012  |         |                 |             |
| HIST2H2BA |         |         | 0.0011  |                 |             |
| HIST2H2BF |         |         | 0.0013  |                 |             |
| IL17A     | 0.0024  | -0.0015 | -0.0011 |                 |             |
| IL17F     |         | -0.0015 | -0.0019 |                 |             |
| INTS4     | -0.0013 |         |         |                 |             |
| JARID2    | -0.0015 |         |         |                 |             |
| KCTD21    | -0.0011 |         |         |                 |             |
| KDEL2     | -0.0011 |         |         |                 |             |
| KLHL12    | -0.0015 |         |         |                 |             |
| LYNX1     | -0.0012 |         |         |                 |             |
| METTL21C  | 0.0013  | -0.0012 | 0.0016  |                 |             |
| MRM2      | -0.001  |         |         |                 |             |
| NKAIN2    | -0.0015 | 0.001   | 0.0013  | 0.0011          |             |
| NOV       | 0.0011  |         |         | -0.0012         |             |
| OR5C1     | -0.001  |         |         |                 |             |
| OR5L2     |         |         | -0.001  |                 |             |
| PRSS3     | -0.0011 |         |         |                 | 0.0018      |
| RAC1      | -0.0014 |         |         |                 |             |
| RORB      | -0.0011 |         |         |                 |             |

Continued on the next page

Web Table 13: Continued from the previous page

| Gene      | Age     | PN      | Gender | Breslow's depth | Clark level |
|-----------|---------|---------|--------|-----------------|-------------|
| SERPINB13 | -0.0029 |         |        |                 |             |
| SERPINB3  | -0.0014 |         |        |                 |             |
| SETDB2    | -0.0015 | 0.001   | 0.0012 | 0.0018          |             |
| SKIDA1    |         |         |        |                 | -0.0011     |
| SLC18A3   | -0.0014 | 0.0013  |        | 0.0014          |             |
| SMG7      | -0.001  |         |        |                 |             |
| SMIM21    |         | -0.0011 |        |                 |             |
| STMN4     | 0.0015  |         |        |                 |             |
| SYT12     |         |         |        |                 | -0.0011     |
| TAS2R1    | -0.0011 |         |        | -0.0021         |             |
| TMEM266   | 0.0013  |         |        |                 |             |
| TPD52L2   | -0.0011 |         |        |                 |             |
| TRIM46    | -0.0012 |         |        |                 |             |
| TRPC4AP   | -0.0011 |         |        |                 |             |
| UBAP2L    | -0.0011 |         |        |                 |             |
| UBE2Q1    | -0.0011 |         |        |                 |             |
| UBE2V1    | -0.0013 |         |        |                 |             |
| UFC1      | -0.0011 |         |        |                 |             |
| WDR77     | -0.001  |         |        |                 |             |
| YWHAB     | -0.0011 |         |        |                 |             |
| ZC3HC1    | -0.0012 |         |        |                 |             |

## References

- Breheeny, P. and Huang, J. (2009). Penalized methods for bi-level variable selection. *Statistics and its Interface* **2**, 369-380.
- Breheeny, P. and Huang, J. (2011). Coordinate descent algorithms for nonconvex penalized regression, with applications to biological feature selection. *The Annals of Applied Statistics* **5**, 232.
- Chakrabarty, K., Tauber, J.W., Sigel, B., Bombeck, C.T., and Jeffay, H. (1984). Glycerokinase activity in human adipose tissue as related to obesity. *International Journal of Obesity* **8**, 609-622.
- Choi, N. H., Li, W., and Zhu, J. (2010). Variable selection with the strong heredity constraint and its oracle property. *Journal of the American Statistical Association* **105**, 354-364.
- Cin, H., Meyer, C., Herr, R., Janzarik, W.G., Lambert, S., Jones, et al. (2011). Oncogenic FAM131B-CBRAF fusion resulting from 7q34 deletion comprises an alternative mechanism of MAPK pathway activation in pilocytic astrocytoma. *Acta Neuropathologica* **121**, 763-774.
- Cui, Y., Kang, G., Sun, K., Qian, M., Romero, R., and Fu, W. (2008). Gene-centric genomewide association study via entropy. *Genetics* **179**, 637-650.
- Fan, J and Lv, J. (2011). Nonconcave penalized likelihood with NP-dimensionality. *IEEE Transactions on Information Theory* **57**, 5467-5484.
- Fecher, L.A., Amaravadi, R.K., and Flaherty, K.T. (2008). The MAPK pathway in melanoma. *Current Opinion in Oncology* **20**, 183-189.
- Friedman, J., Hastie, T., and Tibshirani, R. (2010). Regularization paths for generalized linear models via coordinate descent. *Journal of Statistical Software* **33**, 1-22.

- Guo, J., Hu, J., Jing, B. Y., and Zhang, Z. (2016). Spline-lasso in high-dimensional linear regression. *Journal of the American Statistical Association* **111**, 288-297.
- Huang, J., Ma, S., Li, H., and Zhang, C. H. (2011). The sparse Laplacian shrinkage estimator for high-dimensional regression. *Annals of Statistics* **39**, 2021-2046.
- Huang, Y., Zhang, Q., Zhang, S., Huang, J., and Ma, S. (2017). Promoting similarity of sparsity structures in integrative analysis with penalization. *Journal of the American Statistical Association* **112**, 342-350.
- Hunt, S.C., Hasstedt, S.J., Xin, Y., Dalley, B. K., Milash, B. A., Yakobson, E., et al. (2011). Polymorphisms in the NPY2R gene show significant associations with BMI that are additive to FTO, MC4R, and NPF2R1 gene effects. *Obesity* **19**, 2241-2247.
- Jung, I. K., Lee, J. S., Choi, C. H., and Kim, D. S. (2011). Inferring relative activity between pathway and downstream genes to classify melanoma cancer progression. *Interdisciplinary Bio Central* **3**, 1-5.
- Krauthammer, M., Kong, Y., Ha, B. H., Evans, P., Bacchicchi, A., McCusker, J. P., et al. (2012). Exome sequencing identifies recurrent somatic RAC1 mutations in melanoma. *Nature Genetics* **44**, 1006-1014.
- Liu, J., Huang, J., Zhang, Y., Lan, Q., Rothman, N., Zheng, T., et al. (2013). Identification of gene-environment interactions in cancer studies using penalization. *Genomics* **102**, 189-194.
- Liu, H., Wang, X., Feng, B., Tang, L., Li, W., Zheng, X., et al. (2018). Golgi phosphoprotein 3 (GOLPH3) promotes hepatocellular carcinoma progression by activating mTOR signaling pathway. *BMC Cancer* **18**, 661.
- Rouault, C., Pellegrinelli, V., Schilch, R., Cotillard, A., Poitou, C., Tordjman, J., et al. (2013).

- Roles of chemokine ligand-2 (CXCL2) and neutrophils in influencing endothelial cell function and inflammation of human adipose tissue. *Endocrinology* **154**, 1069-1079.
- Scott, K. L., Kabbarah, O., Liang, M. C., Ivanova, E., Anagnostou, V., Wu, J., et al. (2009). GOLPH3 modulates mTOR signalling and rapamycin sensitivity in cancer. *Nature* **459**, 1085-1090.
- Song, M.H., Ha, J.C., Lee, S.M., Park, Y.M., and Lee, S. Y. (2011). Identification of BCP-20 (FBXO39) as a cancer/testis antigen from colon cancer patients by SEREX. *Biochemical and Biophysical Research Communications* **408**, 195-201.
- Tseng, P. (2001). Convergence of a block coordinate descent method for nondifferentiable minimization. *Journal of Optimization Theory and Applications* **109**, 475-494.
- Vachtenheim, J., Ondrusova, L., and Borovansky, J. (2010). SWI/SNF chromatin remodeling complex is critical for the expression of microphthalmia-associated transcription factor in melanoma cells. *Biochemical and Biophysical Research Communications* **392**, 454-459.
- Wang, L., Yi, T., Kortylewski, M., Pardoll, D. M., Zeng, D., and Yu, H. (2009). IL-17 can promote tumor growth through an IL-6-CStat3 signaling pathway. *Journal of Experimental Medicine* **206**, 1457-1464.
- Zhang, C. (2011). Nearly unbiased variable selection under minimax concave penalty. *Annals of Statistics* **38**, 894-942.
- Zou, H., and Zhang, H. H. (2009). On the adaptive elastic-net with a diverging number of parameters. *Annals of Statistics* **37**, 1733-1751.
